The submission is intended as an Article

1  
2  
3  
4  
5  
6  
7  
8  
9  
10  
11  
12  
13  
14  
15  
16  
17  
18  
19  
20  
21

**Functional divergence of two duplicated *Fertilization Independent Endosperm* genes in rice  
with respect to seed development**

Meiyao Pan<sup>1,†</sup>, Xiaojun Cheng<sup>1,†</sup>, Zhiguo E<sup>2</sup>, Baixiao Niu<sup>1</sup>, Chen Chen<sup>1\*</sup>

<sup>1</sup> Jiangsu Key Laboratory of Crop Genetics and Physiology/ Key Laboratory of Plant Functional Genomics of the Ministry of Education/ Jiangsu Key Laboratory of Crop Genomics and Molecular Breeding/ Jiangsu Co-Innovation Center for Modern Production Technology of Grain Crops, Agricultural College of Yangzhou University, Yangzhou, China

<sup>2</sup>Key Laboratory of Rice Biology, China National Rice Research Institute, Hangzhou, China

<sup>†</sup> These authors contributed equally to this work

\* Correspondence: [chenchen@yzu.edu.cn](mailto:chenchen@yzu.edu.cn)

Running title: Divergence of the rice FIE genes

22 **Abstract**

23 Fertilization Independent Endosperm (FIE) is an essential member of Polycomb Repression Complex 2 (PRC2)  
24 that plays important roles in the developmental regulation of plants. *OsFIE1* and *OsFIE2* are two *FIE* homologs  
25 in the rice genome. Here, we showed that *OsFIE1* probably duplicated from *OsFIE2* after the origin of the  
26 tribe Oryzae, but has a specific expression pattern and methylation landscape. During evolution, *OsFIE1*  
27 underwent a less intensive purifying selection than did *OsFIE2*. The mutant *osfie1* produced smaller seeds and  
28 displayed reduced dormancy, indicating that *OsFIE1* predominantly functions in late seed development.  
29 Ectopic expression of *OsFIE1*, but not *OsFIE2*, was deleterious to vegetative growth in a dosage-dependent  
30 manner. The newly evolved N-terminal tail of *OsFIE1* was probably not the cause of the adverse effects on  
31 vegetative growth. The CRISPR/Cas9-derived mutant *osfie2* exhibited impaired cellularization of the  
32 endosperm, which suggested that *OsFIE2* is indispensable for early seed development as a positive regulator  
33 of cellularization. Autonomous endosperm was observed in both *OsFIE2*<sup>+/-</sup> and *osfie1/OsFIE2*<sup>+/-</sup> but at a very  
34 low frequency. Although *OsFIE1*-PRC2 exhibited H3K27me3 methyltransferase ability in plants, *OsFIE1*-PRC2 is  
35 likely to be less important for development in rice than is *OsFIE2*-PRC2. Our findings revealed the functional  
36 divergence of *OsFIE1* and *OsFIE2* and shed light on their distinct evolution following duplication.

37

38

## 39 Introduction

40 The endosperm is a product of double fertilization in higher plants (Olsen, 2001). It is a triploid tissue,  
41 produced by fusion between a central cell (2n) and a sperm cell (n). The primary endosperm cell usually  
42 undergoes several rounds of mitotic division uncoupled from cytokinesis, which results in a multinucleate cell  
43 with many free nuclei, termed a syncytium (Olsen, 2001; Wu *et al.*, 2016). Then, the multiple nuclei start to  
44 cellularize and generate the first layer of endosperm cells (Olsen, 2001; Wu *et al.*, 2016). Subsequent cell  
45 divisions allow the endosperm cells to fill the seed. The fate of the endosperm is different in dicots and  
46 monocots; the endosperm is usually consumed in dicots during seed development, while it is retained in  
47 mature seeds of monocots. However, the developmental process of endosperm is quite highly conserved in  
48 plants (Olsen, 2004; Agarwal *et al.*, 2011). As a nutritional supply tissue, the endosperm is indispensable for  
49 embryo development. Either delayed or accelerated cellularization can lead to seed failure in interploidy and  
50 interspecific hybrids (Walia *et al.*, 2009; Ishikawa *et al.*, 2011; Kradofer *et al.*, 2013; Tonosaki *et al.*, 2018).  
51 Developmental defects in the endosperm will cause embryo abortion, which has been found to occur in many  
52 plant species, where it acts as an important reproductive barrier (Chen *et al.*, 2016b).

53 Polycomb repression complex 2 (PRC2) plays an important role in developmental regulation by controlling  
54 epigenetic modification of the genome (Mozgova & Hennig, 2015; Mozgova *et al.*, 2015). PRC2 has  
55 methyltransferase activity for the methylation of Lys27 in histone H3 (H3K27) (Cao *et al.*, 2002; Nallamilli *et al.*,  
56 2013). The major components of PRC2 are highly conserved in animals and plants (Tonosaki & Kinoshita,  
57 2015), both of which include four group members: WD40 protein p55 (p55), Suppressor of Zeste 12 [Su(z)12],  
58 Enhancer of Zeste [E(z)], and extra sex combs (ESC). Fertilization Independent Seed (FIS)-PRC2 of Arabidopsis,  
59 composed of FIS2 (a Su(z)12 member), Fertilization Independent Endosperm (FIE, a ESC member), MEDEA  
60 (MEA, a E(z) member) and Multicopy Suppressors of IRA 1 (MSI1, a p55 member), acts as a key regulator of  
61 seed development (Mozgova *et al.*, 2015). Mutation of these genes results in autonomous endosperm,  
62 developing without fertilization (Ohad *et al.*, 1996; Chaudhury *et al.*, 1997; Kiyosue *et al.*, 1999). In addition,  
63 FIS-PRC2 is indispensable for the transition from the syncytium to cellularized cells in Arabidopsis  
64 (Grossniklaus *et al.*, 1998; Luo *et al.*, 2000; Vinkenoog *et al.*, 2000; Hennig, 2003).

65 Different plant species have evolved distinct members of each PRC2 group (Tonosaki & Kinoshita, 2015). For  
66 example, rice lacks MEA that belongs to the E(z) group and lacks FIS2 that belongs to the Su(z)12 group (Luo  
67 *et al.*, 2009). FIE is the only ESC member that encoded by the Arabidopsis genome. However, species of the  
68 Poaceae usually have multiple FIE homologs (Danilevskaya *et al.*, 2003a; Luo *et al.*, 2009; Kapazoglou *et al.*,  
69 2010). OsFIE1 and OsFIE2, which show marked similarities, are two FIE homologs encoded by the rice genome  
70 (Luo *et al.*, 2009). To date, the mechanism by which PRC2 regulates endosperm development in species other  
71 than Arabidopsis is largely unknown. Overexpression of *OsFIE1* led to a phenotype of short stature, low seed-  
72 setting rate and small seeds (Zhang *et al.*, 2012; Folsom *et al.*, 2014), but no altered phenotype or a very mild

73 phenotype change was exhibited by the RNA interference (RNAi)-mediated knock-down plant or T-DNA  
74 mutant of *OsFIE1* according to previous reports (Yang *et al.*, 2013; Huang *et al.*, 2016). On the other hand,  
75 *OsFIE2* RNAi plants displayed phenotypes similar to those of the *OsFIE1*-overexpressors, such as dwarfism and  
76 reduced seed-setting rate (Nallamilli *et al.*, 2013; Li *et al.*, 2014; Liu *et al.*, 2016). Some inconsistent findings  
77 have been reported according to previous studies. For example, Li *et al.* (2014) found that knock-down of  
78 *OsFIE2* led to an autonomous endosperm but Nallamilli *et al.* (2013) did not observe such an effect. Luo *et al.*  
79 (2009) found that a T-DNA mutant line of *OsFIE1* did not cause any morphological changes, whereas Huang *et al.*  
80 *et al.* (2016) reported that RNAi of *OsFIE1* reduced seed size and delayed embryo development.  
81 *MEA* and *FIS2* are recently evolved PRC2 members as a result of gene duplication in *Arabidopsis* (Spillane *et al.*  
82 *et al.*, 2007). Evolutionary analysis revealed that *MEA* had undergone natural selection in the promoter region  
83 (Kawabe *et al.*, 2007; Spillane *et al.*, 2007; Miyake *et al.*, 2009). Currently, our understanding of how the PRC2  
84 members evolved and how they contribute to adaptation in plants other than *Arabidopsis* is limited (Furihata  
85 *et al.*, 2016). Given the strong similarities between *OsFIE1* and *OsFIE2*, we believed that it would not be a  
86 good strategy to use RNAi lines for functional analysis, owing to the spatiotemporal overlaps of expression of  
87 the two genes in seeds (Li *et al.*, 2014). Therefore, systemic analysis of *OsFIEs* using null mutants is preferred  
88 to achieve a better understanding of the PRC2-regulated endosperm development and to clarify the  
89 controversies that has been reported. In the present study, we combined the use of evolutionary and genetic  
90 approaches to dissect the functional divergence of *OsFIE1* and *OsFIE2*. Our results suggested that *OsFIE1*  
91 evolved from *OsFIE2* by gene duplication after the tribe Oryzeae had evolved. Findings showed that *OsFIE1*  
92 and *OsFIE2* have evolved distinct functions in seed and endosperm development, and that they experienced  
93 different natural selection pressures.

94

## 95 **Results**

### 96 **Divergence of the *FIEs* in rice**

97 *OsFIE1* (Os08g0137100) and *OsFIE2* (Os08g0137250) are closely arrayed on chromosome 8 of rice (*Oryza*  
98 *sativa*), and are separated by a putative actin gene (**Supplementary Fig. 1A**). Such an arrangement is highly  
99 conserved among different *Oryza* species, such as *O. meridionalis* (A genome), *O. punctata* (B genome) and *O.*  
100 *brachyantha* (F genome) (**Supplementary Fig. 1A**), but differs from that in maize, where the two *FIE* homologs  
101 are located on different chromosomes (Danilevskaya *et al.*, 2003b). Next, we used the amino acid sequences  
102 of the *OsFIEs* as queries to search against the genomes of 20 diploid monocot species that had been  
103 deposited in the EnsemblPlants database, namely 11 members of the Oryzeae, four members of the Pooideae  
104 subfamily, three species of the Panicoideae subfamily and two non-grass species (*Dioscorea rotundata* and  
105 *Musa acuminata*). Most of the monocots (16/21) we studied have two *FIE* genes, while *Dioscorea rotundata*,  
106 *Musa acuminata*, *Setaria italica* and *Hordeum vulgare* have one and *Brachypodium distachyon* has four (**Fig.**

107 **1A**). Our phylogenetic analysis indicated that the duplication events of the *FIEs* probably occurred  
108 independently in different monocot genera. For example, two *FIEs* of maize were grouped together, but  
109 *OsFIE1* and *OsFIE2* belonged to two different clades (**Fig. 1A**). The *OsFIE1* homologs were exclusively found in  
110 the Oryzae tribe and were relatively distant from the other *FIE* homologs (**Fig. 1A**). The *FIE2* homologs of the  
111 Oryzae were closer to the *FIEs* of non-Oryzae members of the other monocot species (**Fig. 1A**). The findings  
112 strongly suggested that *FIE1* of the Oryzae evolved from *FIE2*, and that the duplication event probably  
113 occurred after the origin of the tribe Oryzae.

114 Compared with *OsFIE2*, *OsFIE1* had an additional 82 amino acid (aa) residues at its N-terminal end  
115 (**Supplementary Fig. 1B**). This tail was conserved among *Oryza* species, but the *FIE1* homolog of *Leersia*  
116 *perrieri*, which belongs to a different genus of the tribe Oryzae, did not carry this tail (**Supplementary Fig. 2**).  
117 This indicated that this extra N-terminal tail of *OsFIE1* had probably evolved after the genera *Oryza* and  
118 *Leersia* had diverged, which occurred 14.2 million years ago (Kellogg, 2009). Using *L. perrieri* as an outlier  
119 group, we calculated the ratio of the non-synonymous (*dN*) to synonymous (*dS*) substitutions of the *FIE1* and  
120 *FIE2* coding sequences of different *Oryza* species. The results showed that the *dN/dS* ratio of *FIE2* (0.03–0.11)  
121 was significantly lower than that of *FIE1* (0.21–0.27), suggesting that *FIE2* had experienced the more intense  
122 purifying selection in rice (**Fig. 1B**).

123 In line with previous findings (Li *et al.*, 2014), we found that *OsFIE1* and *OsFIE2* displayed quite different  
124 spatiotemporal expression patterns. Expression of *OsFIE1* was specifically activated in the endosperm,  
125 whereas *OsFIE2* is ubiquitously expressed (**Supplementary Fig. 3A and B**). *OsFIE1* and *OsFIE2* showed similar  
126 expression profiles during caryopsis development, being highly upregulated from 3 to 10 d after fertilization  
127 (DAF) (**Supplementary Fig. 3C**). However, *OsFIE2* transcripts were more abundant than those of *OsFIE1* in the  
128 developing caryopsis. The findings suggested that *OsFIE1* had probably been subfunctionalized as a result of  
129 functional divergence following duplication. Divergence of expression usually reflects a change in gene  
130 regulation. We had previous found that application of a DNA methylation inhibitor, 5-aza-2'-deoxycytidine,  
131 could ectopically activate expression of *OsFIE1* in seedlings, whereas *OsFIE2* show limited response to the  
132 chemical (Chen *et al.*, 2018a). We therefore proposed that *OsFIE1* and *OsFIE2* might have distinct DNA  
133 methylation patterns in the genome. To test this hypothesis, we performed bisulfite-PCR (BS-PCR) sequencing  
134 to detect DNA methylation of the two genes. Generally, *OsFIE2* showed higher levels of methylation level than  
135 *OsFIE1* in the promoter region as well as in the coding sequence (**Supplementary Fig. 3D**). Overall, the  
136 methylation level of *OsFIE2* was stable across leaf and endosperm tissues. However, *OsFIE1* was generally  
137 hypomethylated in the endosperm at 6 DAF in comparison with the leaf (**Supplementary Fig. 1A**).

138

### 139 **Deleterious effects of ectopically expressed *OsFIE1***

140 Using the ubiquitin promoter of maize to drive the ectopic expression of *OsFIE1* (*Ubi::OsFIE1*) resulted in

141 substantially decreased plant height and increased tiller numbers (Fig. 2A and B), phenotypic effects which  
142 were consistent with previous findings (Zhang *et al.*, 2012; Folsom *et al.*, 2014). We then analyzed histone  
143 modifications of the *Ubi::OsFIE1* lines using antibodies that react exclusively against tri-methylated histone H3  
144 at lysine 27 (H3K27me3). The results showed that H3K27me3 was significantly elevated in *Ubi::OsFIE1* (Fig.  
145 2C). This finding indicated that, similar to OsFIE2 (Nallamilli *et al.*, 2013), the OsFIE1-PRC2 complex has  
146 histone methyltransferase activity for H3K27me3 *in vivo*. We also used the *OsFIE2* promoter to drive the  
147 expression of *OsFIE1* (*pOsFIE2::OsFIE1*) in rice (Fig. 2D and E). The transgenic plants showed moderate (~20-  
148 fold) up-regulation of *OsFIE1* expression in leaves (Fig. 2E). However, the *OsFIE2::OsFIE1* lines did not show  
149 the dwarf phenotype as was displayed by *Ubi::OsFIE1* (Fig. 2A). These findings suggested that the adverse  
150 effects of ectopically expressed *OsFIE1* occurred when *OsFIE1* products accumulated to a high concentration  
151 in vegetative tissues. However, moderate up-regulation, resembling that of *OsFIE2*, appeared not to induce  
152 these defects. Therefore, the adverse effects are dosage dependent.

153 OsFIE1 has an extra tail segment at the N-terminus (Supplementary Fig. 1B). To discuss whether the tail  
154 contributes to the deleterious phenotypic effects on vegetative growth, we generated two chimeric OsFIEs,  
155 namely Chi-OsFIEa and Chi-OsFIEb, by swapping the N-terminus of OsFIE1 to OsFIE2 as illustrated in Fig. 3A.  
156 Overexpression of the chimeric *OsFIEs* driven by the ubiquitin promoter of maize (Fig. 3B) did not cause  
157 growth defects as had been displayed in *Ubi::OsFIE1* (Fig. 3C and D). The plant height and tiller number of *Chi-*  
158 *OsFIEa* and *Chi-OsFIEb* were comparable to the corresponding values for the wild type (WT) but were  
159 significantly different from those in *Ubi::OsFIE1* (Fig. 3E and F). The results suggested that the extra N-  
160 terminal segment of OsFIE1 alone was not the cause of the vegetative defects observed.

161

#### 162 **Up-regulation of *OsFIE1* expression in endosperm reduced the seed size of rice**

163 Previous studies had suggested that overexpression of *OsFIE1* led to reduced seed size (Fig. 4A; Zhang *et al.*,  
164 2012; Folsom *et al.*, 2014). However, it was unclear whether the phenotype was directly caused by the  
165 overexpression of *OsFIE1* in seeds, or whether it was an indirect effect of ectopic expression of *OsFIE1*,  
166 reflecting the reduced stature and impaired vegetative growth (Fig. 2A). To clarify the effects of *OsFIE1*  
167 overexpression on seed development, we specifically activated its expression in the endosperm, using the  
168 promoter of the *rice glutelin 1* gene (Russell & Fromm, 1997) to drive *OsFIE1* (*GT1::OsFIE1*). The expression of  
169 *OsFIE1* in the endosperm in independent transgenic lines was significantly increased, whereas the expression  
170 of *OsFIE2* was not altered in the transgenic plants (Fig. 4B). Unlike the *Ubi::OsFIE1* plants, the *GT1::OsFIE1*  
171 lines showed vegetative development similar to that of the WT (Fig. 4C). However, all three independent  
172 *GT1::OsFIE1* transgenic lines analyzed produced seeds significantly smaller than the WT seeds (Fig. 4A and D-  
173 F). One-thousand-grain weight of *GT1::OsFIE1* was reduced to 86–88% of the WT value (Fig. 4G). The results  
174 unambiguously indicated that overexpression of *OsFIE1* could directly affect seed development.

175

176 **Mutant *osfie1* showed smaller seeds and increased pre-harvest sprouting**

177 To investigate the function of *OsFIE1*, we generated two independent CRISPR/Cas9 *osfie1* mutant lines using  
178 different targets (1-T1 and 1-T2) (Fig. 5A). The vegetative growth of *osfie1* was not distinguishable from that  
179 of the WT (Fig. 5B). In line with the findings by Huang *et al.* (2016), our results showed that the seed size and  
180 seed weight of *osfie1* were greatly reduced relative to the WT (Fig. 5C and D), these effects being associated  
181 with reduced seed width and thickness, rather than shorter seed length (Fig. 5E-G).

182 Notably, we observed that *osfie1* exhibited a significantly higher pre-harvest sprouting phenotype in the  
183 paddy field in each of two seasons (Fig. 5H), which suggested that *OsFIE1* might positively regulate dormancy  
184 in rice. To confirm this, we carried out germination tests on near-mature seeds (~30 DAF) that had been  
185 directly collected from field without drying. More than 15 % of the seeds of *osfie1-1* and *osfie1-2* germinated,  
186 but less than 7% WT seeds germinated after 7 d after imbibition (DAI) (Fig. 5I). Next, we used differently aged  
187 seeds of different genotypes in the germination test (Fig. 5J). The results showed that *osife1* had a  
188 significantly higher germination potential than WT in terms of the immature seeds, with more than 20% of  
189 the 23 DAF seeds germinating at 7 DAI, which was significantly higher than that of the WT (Fig. 5J).

190

191 ***OsFIE2*, but not *OsFIE1*, is required for cellularization of the endosperm**

192 Previous studies had shown that *OsFIE2* RNAi plants had a lower seed-set rate, with some of the seeds  
193 produced being abnormal (Nallamilli *et al.*, 2013; Li *et al.*, 2014), but the mechanism by which *OsFIE2* affects  
194 seed development is still largely unknown. Because of the strong similarities between *OsFIE1* and *OsFIE2*  
195 (Supplementary Fig. 1B), we believed that it would not be a good strategy to use RNAi lines for the study of  
196 seed or endosperm development, owing to the overlap in terms of spatiotemporal expression of these two  
197 genes in seeds (Supplementary Fig. 1E). Therefore, we made efforts to generate *osfie2* mutants using a  
198 CRISPR/Cas9 approach (Fig. 6A). Unfortunately, despite the use of three different targets (2-T1, 2-T2 and 2-T3),  
199 our attempts to obtain callus-regenerated homozygous mutants of *OsFIE2* at the T<sub>0</sub> generation failed,  
200 although heterozygous *OsFIE2*<sup>+/-</sup> plants were readily obtained (Fig. 6B). In contrast, we could obtain  
201 homozygous mutants of *OsFIE1* at a high frequency (~30%) in the T<sub>0</sub> generation (Fig. 6B). In addition, we used  
202 a single construct with a cassette consisting of both 1-T1 and 2-T2, attempting to knock-out *OsFIE1* and  
203 *OsFIE2* simultaneously. We succeeded in obtaining the *osfie1* mutant in the homozygous condition at the  
204 *OsFIE1* locus, but again only heterozygous (*osfie1/OsFIE2*<sup>+/-</sup>) were obtained at the *OsFIE2* locus (Fig. 6B).  
205 According to these findings, we inferred that *OsFIE2*, but not *OsFIE1*, is indispensable for rice regeneration.  
206 Alternatively, *OsFIE2* is more essential for development, because the transformants lacking functional *OsFIE2*  
207 were not viable.

208 In a segregating population from self-pollinated *OsFIE2*<sup>+/-</sup>, only *OsFIE2*<sup>+/+</sup> and *OsFIE2*<sup>+/-</sup> plants were obtained

209 (Fig. 6C). After 5 DAF, the seeds produced by *OsFIE2*<sup>+/-</sup> could readily be categorized into two seed classes (Fig.  
210 6E). Seeds of Class 1 showed an appearance similar to that of the WT, while seeds of Class 2 showed growth  
211 cessation frequently, illustrated with a swollen belly consisted watery endosperm (Fig. 6E). At maturity, the  
212 Class 2 seeds were completely empty (Supplementary Fig. 4). In agreement with this observation, the seed-  
213 set rate of *OsFIE2*<sup>+/-</sup> and *osfie1/OsFIE2*<sup>+/-</sup> was significantly lower than that of WT or *osfie1* (Fig. 6D). Notably,  
214 the rate of unfertilized seeds, which failed to show enlargement of the caryopses, was significantly increased  
215 in *OsFIE2*<sup>+</sup> (16.5%) and *osfie1/OsFIE2*<sup>+</sup> (5.1%) in comparison to that of the WT (1.7%). This was likely not  
216 caused by lower viability of the male or female gametes. Because the development of pollens and embryo  
217 sacs seemed normal in *OsFIE2*<sup>+/-</sup> and *osfie1/OsFIE2*<sup>+/-</sup> (Supplementary Fig. 5A-H).

218 The Class 1 seeds produced a starchy endosperm at 15 DAF, whereas the Class 2 seeds produced a watery  
219 endosperm instead at this time point (Fig. 6E). Because we had failed to obtain the *osfie2* mutant, we  
220 believed that the Class 2 seeds were the homozygotes. The Class 1 seeds were morphologically different from  
221 the Class 2 seeds after 4–5 DAF. Early endosperm development of Class 2 seeds was impaired (Fig. 7A-L). In  
222 seeds of WT and *osfie1* at 4 DAF, cellularized endosperm cells completely filled the embryo sac (Fig. 7I and J),  
223 but only a few layers of endosperm cells were observed in *osfie2* or *osfie1,2* caryopses at this time point (Fig.  
224 7K and L), which indicated that cellularization of the Class 2 seeds was delayed or impaired. At 7 DAF, most of  
225 the *osfie2* seeds still had an empty vacuole. A few seeds had multiple layers of loosely packed endosperm  
226 cells (Fig. 7M and N), but much less starch had accumulated in these cells, as revealed by I<sub>2</sub>-KI staining assay,  
227 compared with WT seeds (Fig. 7O and P). In line with this observation, expression of some key genes  
228 involving starch biosynthesis, including *OsAGPL2*, *OsPUL*, *OsGBSSI*, *OsISA2*, *RPBF* and *RISBZ1*, were  
229 substantially down-regulated in *osfie2* and *osfie1,2* seeds at 6 DAF (Fig. 7Q-V). On the other hand, expression  
230 of *OsAPGL1* and a negative regulator gene of starch biosynthesis, *RSR1*, were upregulated (Fig. 7W and X).

231 The I<sub>2</sub>-KI staining experiment showed that starch accumulation was not affected in the seed coat of *osfie2* (Fig.  
232 7O and P), suggesting that the development of the seed coat and integument were probably not strongly  
233 impaired. Notably, early endosperm development of *osfie1* seemed not to be affected (Fig. 7B, F and J).

234 Together, the results suggested that *OsFIE2*, but not *OsFIE1*, is essential for early endosperm development in  
235 rice.

236 The embryo development of neither *osfie2* nor *osfie1,2* was significantly affected at 4 DAF, relative to the WT  
237 (Supplementary Fig. 6). As with the WT, globular embryos could be observed in the mutants at 4 DAF  
238 (Supplementary Fig. 6A-C). However, embryos of *osfie2* were not still observable at 15 DAF (Supplementary  
239 Fig. 6D and E). The embryos had probably degenerated by this point, leaving a cavity in most of the seeds  
240 which could be seen (Supplementary Fig. 6D and E). We found embryos in two of the five *osfie1,2* seeds we  
241 studied, but the development of these had already ceased (Supplementary Fig. 6F). The results suggested  
242 that the embryogenesis of *osfie2* and *osfie1,2* was arrested, as was endosperm development.



243

#### 244 **Autonomous endosperm production was occasionally observed in *osfie2* mutants**

245 Mutation of *FIE* in Arabidopsis can lead to autonomous endosperm production without fertilization (Ohad *et*  
246 *al.*, 1996; Chaudhury *et al.*, 1997; Kiyosue *et al.*, 1999). However, whether *OsFIE1* and *OsFIE2* play similar roles  
247 in the repression of ovary proliferation in rice is not clear. In the present study, WT, *osfie1*, *OsFIE2*<sup>+</sup> and  
248 *osfie1/OsFIE2*<sup>+</sup> panicles were emasculated before flowering and bagged to prevent cross-pollination. No  
249 autonomous seeds were produced by the 162 emasculated spikelets of WT and the 76 emasculated spikelets  
250 of *osfie1* (Fig. 8A). However, *OsFIE2*<sup>+</sup> and *osfie1/OsFIE2*<sup>+</sup> were able to produce autonomous seeds at a very  
251 low frequency (2.6% of *OsFIE2*<sup>+</sup> and 4.9% of *osfie1/OsFIE2*<sup>+</sup>) (Fig. 8A). The autonomous seeds were not able  
252 to accumulate starch. They were completely empty when dried (Fig. 8B and C).

253

#### 254 **Additive effects of *OsFIE1* and *OsFIE2* on gene expression**

255 In order to dissect how *OsFIE1* and *OsFIE2* function in seed development, we carried out RNA-Seq to discover  
256 differentially expressed genes (DEGs) from *osfie1*, *osfie2* and the *osfie1,2* double mutant. In caryopses at 5  
257 DAF, using the cutoff thresholds of FC (fold change) >2 and FDR (false discovery rate) <0.05, 112 and 701  
258 genes were down- and upregulated, respectively, in *osfie1* when compared with WT (Fig. 9A and B). The  
259 number of DEGs was much higher in *osfie2* and *osfie1,2*. A total of 1,110 down-regulated DEGs and 6,175  
260 upregulated DEGs were identified from *osfie2*, whereas 1,152 down-regulated DEGs and 5,826 upregulated  
261 DEGs were identified from *osfie1,2* (Fig. 9A and B). Most of the DEGs were upregulated relative to the WT (Fig.  
262 9A and B), a finding which was consistent with the functions of *OsFIE1* and *OsFIE2*, which are involved in  
263 H3K27me3 modification of chromatin.

264 Most of the DEGs identified from *osfie2* and *osfie1,2* overlapped (Fig. 9A and B). MapMan analysis suggested  
265 that genes related to storage protein biosynthesis, lipid metabolism, cell wall synthesis, and DNA synthesis  
266 were enriched (Benjamini-Hochberg corrected FDR < 0.05) in *osfie2* and *osfie1,2* (Fig. 9C). This result was in  
267 line with the observations that cellularization of *osfie2* was delayed and starch was not accumulated in *osfie2*  
268 endosperm (Fig. 6). Notably, several groups of transcription factor, such as homeobox, MADS box, WRKY and  
269 C2H2 CO-like zinc finger genes, were also enriched among the DEGs (Fig. 9C), indicating that these  
270 transcription factors play essential roles in early seed development of rice. Several type I MADS-box genes of  
271 Arabidopsis were found to act as negative regulators of cellularization. Notably, many MADS-box genes in rice,  
272 including MIKC-type and type I genes were significantly upregulated in *osfie1* and *osfie1,2* seeds  
273 (Supplementary Fig. 7). These genes may also be involved in the early endosperm development of rice.

274 Compared with *osfie2* and the *osfie1,2* double mutant, *osfie1* showed fewer effects on expression in seeds  
275 early in development (Fig. 9A and B), which further supported our hypothesis that *OsFIE1* is less important  
276 than *OsFIE2* for early seed development. Gene Ontology analysis revealed that genes involved in

277 photosynthesis (FDR = 9.4e-05), cell wall organization or biogenesis (FDR= 9.4e-05) and response to stimuli  
278 (FDR= 0.0032) were significantly enriched among the DEGs identified from *osfie1*. About 85.7% of the down-  
279 regulated DEGs and 63.5% of the upregulated DEGs identified from *osfie1* also showed differential expression  
280 in *osfie2* or *osfie1,2* (Fig. 9A and B), suggesting that these genes are probably common targets regulated by  
281 OsFIE1 and OsFIE2.

282 Intriguingly, we found that the DEGs common to *osfie1*, *osfie2* and *osfie1,2* (Fig. 9A and B) were additively  
283 regulated by *OsFIE1* and *OsFIE2*. Overall, mutation of *OsFIE2* led to a larger effect than mutation of *OsFIE1*,  
284 whereas the *osfie1,2* double mutant showed the greatest change in expression (Fig. 9D). For example, among  
285 the common down-regulated DEGs (68 in total), twenty-three were storage protein-precursor-encoding genes.  
286 These genes were highly expressed in the WT, but were greatly suppressed in the mutants, with the degree of  
287 suppression being in the order *osfie1*<*osfie2*<*osfie1,2* (Fig. 9E). In contrast, 17 genes related to photosynthesis  
288 were upregulated in the mutant lines, which overall showed greatest transcript abundance in *osfie1,2* and  
289 moderate up-regulation in *osfie2*, while *osfie1* showed the least up-regulation (Fig. 9F). Taken together, these  
290 findings suggested that *OsFIE1* plays only a limited function in early seed development. However, *OsFIE1* can  
291 coordinate with *OSFIE2* in an additive manner to regulate most of the DEGs that were identified from *osfie1*.

292

## 293 Discussion

294 The components of PRC2 are conserved between animals and plants. For animals, there are usually only one  
295 or two members of each of the PRC2 groups p55, E(z), Su(z)12 and ESC. However, plants usually have  
296 multiples of each group (Furihata *et al.*, 2016). For example, most of the monocots we analyzed in the present  
297 study had two or more *FIE* genes (Fig. 1A). The *FIE*s of the different graminaceous genera probably evolved as  
298 a result of independent duplication events. A duplication that occurred after the origin of the tribe Oryzeae  
299 generated two *FIE* orthologs, *OsFIE1* and *OsFIE2*, in rice. The phylogenetic and alignment analyses suggested  
300 that *OsFIE2* is the more ancient gene (Fig. 1A and Supplementary Fig. 2), because it is more similar to the *FIE*s  
301 of other grass species. *OsFIE2* could promote cellularization like *AtFIE* acts in Arabidopsis (Vinkenoog *et al.*,  
302 2000), but *OsFIE1* showed only limited effects in early endosperm development in rice (Fig. 7A-P). The  
303 expression pattern and the methylation landscape of *OsFIE1* and *OsFIE2* were quite distinct (Supplementary  
304 Fig. 1), which suggested that the genes had probably diverged since they evolved. *OsFIE2* is universally  
305 expressed, but it is highly methylated in the promoter region when compared with *OsFIE1* (Supplementary  
306 Fig. 2B and D). Usually methylation act as a repression mark for gene expression (Deng *et al.*, 2016), whereas  
307 there have been findings suggesting that hypermethylation may also be involved in up-regulation of certain  
308 genes in crops (Lang *et al.*, 2017). Expression of *OsFIE1* is restricted to the endosperm (Supplementary Fig.  
309 2A), possibly due to its deleterious effects when ectopically expressed in vegetative tissues (Fig. 2A). Previous  
310 studies had found that overexpression of *OsFIE1*, but not *OsFIE2*, could lead to dwarfism (Zhang *et al.*, 2012;

311 Folsom *et al.*, 2014). In the current study, we found that the adverse effects caused by *OsFIE1* were dosage  
312 dependent (**Fig. 2**), with moderate up-regulation of *OsFIE1* in the seedling not resulting in developmental  
313 defects. So far, we still do not know why *OsFIE1*, but not *OsFIE2*, is harmful to vegetative growth. The “gene  
314 swapping” experiments suggested that the extra N-terminal tail of *OsFIE1* only was not able to induce the  
315 deleterious effects (**Fig. 3**). The alignment analysis indicated that, in addition to the N-terminal difference,  
316 *OsFIE1* has an extra 8-aa segment at the C-terminal end (**Supplementary Fig. 1B**). This difference, as well as  
317 the amino acid substitutions found in *OsFIE1*, may contribute to the deleterious effects.

318 The *osfie1* mutant produced smaller seeds and showed increased frequency of pre-harvest sprouting relative  
319 to the WT (**Fig. 5**), suggesting that *OsFIE1* plays roles in late seed development (**Fig. 10**). In support of this  
320 hypothesis, many DEGs identified in *osfie1* were responsible for storage protein biosynthesis (**Fig. 9C**).  
321 Interestingly, *OsEMF2b*, a member of Su(z)12 group in rice, has recently been found to function in seed  
322 dormancy by modulating the expression of *OsVP1* (Chen *et al.*, 2017). Therefore, *OsFIE1* and *OsEMF2b* are  
323 possibly recruited into the same PRC2 that regulates seed dormancy and germination. In agreement, many  
324 regulators of late seed development and germination of Arabidopsis, such as *LEAFY COTYLEDON 2 (LEC2)*,  
325 *ABSCISIC ACID INSENSITIVE 3 (ABI3)*, *FUSCA 3 (FUS3)*, *ABI4* and *DELAY OF GERMINATION 1 (DOG1)*, were  
326 upregulated in *fie* mutant seedlings, possibly due to depletion of H3K27me3 of these genes (Bouyer *et al.*,  
327 2011). The mechanism by which *OsFIE1* regulates dormancy in rice need to be further investigated. Because  
328 we failed to obtain an *osfie2* mutant, it is unclear whether *OsFIE2* functions on dormancy as well. However,  
329 PRC2-regulated seed dormancy and germination have been reported in monocots and dicots, suggesting that  
330 this function of PRC2 is conserved in plants. Taking into account that *OsFIE2* is probably the more ancient  
331 ortholog, we believe that *OsFIE2* functions in late seed development as well (**Fig. 10**).

332 Evidence from the present study suggested that *OsFIE2* is essential for early endosperm development *via* the  
333 promotion of cellularization (**Fig. 7**). In Arabidopsis, FIS2-PRC2 can regulate a group of type I MADS-box genes  
334 in early endosperm development (Köhler *et al.*, 2003; Figueiredo *et al.*, 2015; Zhang *et al.*, 2018). Seeds with  
335 dysfunctional MADS genes, such as *AGAMOUS-LIKE 62 (AGL62)* and *AGL80*, may be aborted due to  
336 cellularization defects (Portereiko *et al.*, 2006; Kang *et al.*, 2008). Type I MADS-box genes probably act as  
337 negative regulators of cellularization (Pires, 2014), which is opposite to the role that FIE2-PRC2 plays. We  
338 previously found that the type I MADS-box genes in rice were associated with syncytium development; their  
339 expression being substantially suppressed during cellularization (Chen *et al.*, 2016a). In the present study, we  
340 found that expression of many MADS-box genes were disrupted in *osfie2*, whereas *osfie1* displayed limited  
341 impacts on these genes (**Fig. 9C and Supplementary Fig. 7**). The results suggested that *OsFIE2*-PRC2 may  
342 suppress the expression of these MADS-box genes, in order to promote cellularization in rice.

343 Plants that overexpressed *OsFIE1* showed more H3K27me3 marks on the chromatin (**Fig. 2B**), indicating that,  
344 as well as *OsFIE2* (Nallamilli *et al.*, 2013), *OsFIE1* exhibits methyltransferase activity *in vivo*. However, several

345 lines of evidence revealed in the current study suggested that *OsFIE1* is probably not as essential for rice  
346 development as is *OsFIE2*. Firstly, in an evolutionary scenario, *OsFIE2* had undergone more intensive purifying  
347 selection than *OsFIE1*, as indicated by the lower *dN/dS* of *OsFIE2* in comparison with *OsFIE1* (Fig. 1B).  
348 Secondly, a mutation in *OsFIE1* had only mild effects on seed development. Cellularization in *osfie1* was not  
349 affected, whereas it was significantly delayed in *osfie2* (Fig. 7). Thirdly, transcriptome analysis revealed that,  
350 for the common DEGs identified from *osfie1*, *osfie2* and the double mutant, additive effects were observed  
351 for the genes' expression (Fig. 9D-F). The *osfie1,2* double mutant usually showed the greatest effects,  
352 whereas *osfie2* showed only a moderate interference. Expression of these DEGs were affected to a lesser  
353 extent when compared with *osfie2* or *osfie1,2*. Finally, yet importantly, we could readily obtain homozygous  
354 mutants of *osfie1* from the callus-regenerated plants at the T<sub>0</sub> generation (Fig. 6B), but *osfie2* homozygotes  
355 were not available by the same approach, probably due to its lethality. The results suggested that *OsFIE2* are  
356 indispensable for regeneration and vegetative growth of rice. Previous studies had found that *OsFIE2* RNAi  
357 plants showed phenotypes such as short stature and low seed setting (Nallamilli *et al.*, 2013; Liu *et al.*, 2016),  
358 which are similar to the phenotypes exhibited by *OsFIE1*-overexpressors (Zhang *et al.*, 2012; Folsom *et al.*,  
359 2014). We therefore assumed that *OsFIE1* and *OsFIE2* might compete with each other for members of PRC2.  
360 Overexpression of *OsFIE1* may increase the malfunctional *OsFIE1*-PRC2 but decrease the functional *FIE2*-PRC2  
361 in plants.

362 Autonomous endosperm has been observed in *FIS2*-PRC2 mutants (Ohad *et al.*, 1996; Chaudhury *et al.*, 1997;  
363 Kiyosue *et al.*, 1999). However, inconsistent findings have been reported, regarding whether rice PRC2  
364 mutants are able to induce autonomous endosperm (Nallamilli *et al.*, 2013; Li *et al.*, 2014). Our findings  
365 suggested that *osfie2* may cause autonomous endosperm, but at a very low frequency (Fig. 8). About 2.6% of  
366 the emasculated *OsFIE2*<sup>+/-</sup> produced autonomous endosperm. This rate was slightly higher in *osfie1/OsFIE2*<sup>+/-</sup>  
367 (~4.9%). If the frequency of autonomous endosperm was all contributed by the *osfie2* haploid (representing  
368 half of the female gametes produced by a heterozygote), the frequency of autonomous endosperm by *osfie2*  
369 homozygotes would be no more than 10% in rice. This is much lower than that observed in *AtFIE* of  
370 Arabidopsis. Nearly 50 percent of female gametes produced by a *FIE/fie* heterozygote had multinucleate  
371 central cells at six days after anthers removed (Ohad *et al.*, 1996), but in a genetic background dependent  
372 manner (Roszak & Kohler, 2011). The findings suggested that, in addition to PRC2 complex, suppression of  
373 proliferation of the central cell before fertilization requires other regulators in rice. Recent findings suggested  
374 that auxin is a signal molecule common to both Arabidopsis and rice for the induction of autonomous  
375 endosperm and early seed development (Zhao *et al.*, 2013; Figueiredo *et al.*, 2015, 2016; Batista *et al.*, 2019).  
376 In Arabidopsis, the activation of auxin biosynthesis is negatively regulated by *FIS2*-PRC2 in the central cell  
377 (Figueiredo & Köhler, 2018). Whether rice employs a similar way to block mitotic division of the central cell  
378 before fertilization needs to be further elucidated. The evidence provided in the present study suggested that

379 PRC2 defects caused by *OsFIE1* and *OsFIE2* may not induce activation of auxin biosynthesis in rice before  
380 fertilization, as reflected in the low frequency of autonomous endosperm observed in *osfie1* and *osfie2* (Fig.  
381 **8A**).

382

383

## 384 **Materials and methods**

### 385 **Plant materials and growth conditions**

386 The rice (Kitaake, *O. sativa* ssp. *japonica*) plants were grown in paddy fields in Yangzhou, Jiangsu Province,  
387 China, during the summer season, and in paddy fields in Lingshui, Hainan Province, during the winter season.  
388 The plants were managed with addition of standard amounts of water and nutrients, according to local  
389 farming practices. The seeds within the spikelets were labeled with marker pens with respect to the date of  
390 anthesis. Different-aged caryopses, along with other tissues, were collected for subsequent experiments.

391

### 392 **Phylogenetic analysis and calculation of *dN/dS***

393 The FIE homologs of monocots were identified through BlastP searching, using *OsFIE1* and *OsFIE2* protein  
394 sequences as the queries to search against the protein database of EnsemblPlants  
395 (<http://plants.ensembl.org/index.html>). The homologs obtained were aligned by Clustal Omega  
396 (<https://www.ebi.ac.uk/Tools/msa/clustalo/>). The aligned sequences were submitted to MEGA7 for  
397 phylogenetic analysis using the maximum likelihood method. The Ka/Ks program of the TBtools package  
398 (Chen *et al.*, 2018b) was used to calculate *dN/dS*. *L. perrieri* was used as an out-group. Coding sequences were  
399 used for the calculations.

400

### 401 **Vector constructions and transformation**

402 A gene SOEing (Splicing by Overlap Extension) approach (Horton *et al.*, 2013) was applied to amplify *ChiFIE1*,  
403 *ChiFIEb* and *pOsFIE2::OsFIE1*. The coding sequence of *OsFIE1* and the inter-changed *OsFIEs* were cloned into  
404 pENTR/D-TOPO entry vector (Invitrogen) and then recombined into the destination vector, pANIC6A, for the  
405 *Ubi::OsFIE1* and *Chi-OsFIEs* constructs. The reactions were carried out following the instructions of the  
406 manufacturer of the LR Clonase Kit (Invitrogen). The coding sequence of *OsFIE1* was cloned into  
407 pCAMBIA1300-GT1 to obtain the *OsGT1::OsFIE1* construct using the ClonExpress® II One Step Cloning Kit  
408 (Vazyme). The promoter region of *OsFIE2* and the coding sequence of *OsFIE1* were simultaneously cloned into  
409 pCAMBIA1300 for the *pOsFIE2::OsFIE1* construct using the ClonExpress® II Multi step Cloning Kit (Vazyme).  
410 The targets for CRISPR/Cas9 constructs were cloned into BGK032 using a CRISPR/Cas9 vector constructing kit  
411 (Biogle). The primers used for vector constructions are listed in Supplementary Table 3. The constructs were  
412 then transformed into the embryo-induced calli of rice. The methodologies were as described in our previous

413 report (Chen *et al.*, 2016a).

414

#### 415 **DNA extraction and bisulfite sequencing**

416 Genomic DNA was isolated from leaves and endosperm of wild-type rice using the EasyPure Plant Genomic  
417 DNA Kit (Transgen). Bisulfite sequencing was performed as described in our previous report (Chen *et al.*,  
418 2016a). Briefly, 1 µg of genomic DNA was treated with sodium bisulfite using an EZ DNA Methylation Kit  
419 (Zymo). The treated DNA was used as the templates to amplify the *OsFIE1* and *OsFIE2* segments (150–300 bp;  
420 primers are listed in Supplementary Table 3). We then cloned the PCR products into a pEAZY-T3 cloning vector  
421 (Transgen). For each amplicon, at least 10 clones were sequenced. The sequencing data were submitted to  
422 Kismeth for bisulfite analysis (Gruntman *et al.*, 2008).

423

#### 424 **RNA extraction and real-time PCR assay**

425 Total RNA was extracted from different tissues of rice 'Kitaake' using Plant RNA Kit (Omega). First-strand  
426 complementary DNA was synthesized by HiScript Q-RT SuperMix for qPCR (Vazyme) using the oligo-dT primer.  
427 Quantitative real-time qPCR was performed according to the manufacturer's instructions of the AceQ qPCR  
428 SYBR Green Master Mix (Vazyme), using the CFX Connect Real-Time PCR Detection System (BioRad). Three  
429 biological replicates were set up for each experiment. The primers used in the experiment are listed in  
430 Supplementary Table 3.

431

#### 432 **RNA-Seq and differential expression analysis**

433 RNA isolated from caryopses of the WT, *osfie1*, *osfie2* and *osfie1,2* at 5 DAF was used for RNA-Seq. We set up  
434 three biological replicates for WT and *osfie1*, and two biological replicates for *osfie2* and *osfie1,2*. The samples  
435 were submitted to Novogene Co. Ltd (Tianjin) for library preparation and sequencing. Briefly, 1.5 µg high-  
436 quality RNA per sample was used for library preparation using NEBNext® Ultra™ RNA Library Prep Kit, and  
437 index codes were added to each sample. Library quality was assessed on the Agilent Bioanalyzer 2100 system.  
438 The clustering of the index-coded samples was performed on a cBot Cluster Generation System using the  
439 TruSeq PE Cluster Kit v3-cBot-HS (Illumina). The libraries were sequenced using the Illumina Nova 6000  
440 platform.

441 The raw fastq reads were processed through in-house perl scripts to remove adapters and low-quality reads.  
442 The clean reads were imported into the CLC Genomics Workbench 12.0 and mapped to the reference genome  
443 using global alignment mode with the default mapping parameters. The expression values, including total  
444 counts, unique counts, TPM and RPKM, were calculated for the identification of DEGs, using the threshold  
445 fold- change>2 and FDR < 0.05.

446

447 **Nuclear protein extraction and western blotting**

448 The leaves from WT and *Ubi:OsFIE1* were finely ground into a powder with liquid nitrogen. The nuclear  
449 protein extraction buffer [20 mM Tris-HCl (pH 8.0), 300 mM NaCl, 0.4 M sucrose, 10 mM MgCl<sub>2</sub>, 1 mM  
450 dithiothreitol, 1 mM phenylmethylsulfonyl fluoride, and 5 mM 2-mercaptoethanol] was added with the ratio  
451 leaves (g)/buffer (ml) of 1:20 for histone protein extraction. The extracted mixture was sequentially  
452 precipitated by sulfuric acid solution (0.25 M), trichloroacetic acid (TCA) (90% 0.25 M sulfuric acid, 10% TCA),  
453 and pre-cooled acetone. After removing the supernatant and drying the pellet, an appropriate amount of  
454 phosphate-buffered saline (pH 7.0)PBS was added to re-suspend the pellet.

455 The nuclear proteins were used for western blot analysis. Antibodies used in this study were anti- H3K27me3  
456 (Abcam) and anti-H3 (Abcam). Two independent experiments were performed with two biological replicates  
457 for each sample.

458

459 **Sectioning and microscopy**

460 The caryopses were fixed and infiltrated in FAA solution, and stored at 4 °C for use. Samples were dehydrated  
461 through a graded ethanol series and infiltrated with xylene, and then embedded in resin, sectioned at 2.5 μm,  
462 and stained with 0.1% Toluidine Blue. The embryo sac and embryogenesis observation were performed by a  
463 previously described method with modification (Hara *et al.*, 2015). Briefly, the caryopses were fixed in FAA  
464 overnight. After replacing the solution with 70% ethanol, the samples were incubated overnight, subjected to  
465 an ethanol series and washed twice with PBS for 30 min. After treatment with RNase A (100 μg/ml) for 20 h,  
466 the samples were stained with DAPI (Sigma, 5 μg/ml) at 4 °C overnight in dark. The samples were then  
467 washed with PBS three times each for 3 h, dehydrated by an ethanol series, and washed twice with absolute  
468 ethanol for 30 min. After dehydration, the samples were treated with a methanol-methyl salicylate series (2:1,  
469 1:1, and 1:2 (v/v) each for 1 h), washed three times with methyl salicylate for 1 h, kept at 4 °C overnight in  
470 methyl salicylate and observed by a laser confocal microscope (Zeiss, LSM710).

471

472 **Germination assay**

473 To test the germination of near-mature seeds, the seeds (~25-30 DAF) produced by the main stem were  
474 collected. The panicles were put into a horizontally placed germination bag in growth chamber (14-h-day and  
475 10-h-night settings, 25 °C/20°C day/night temperature). The germination rate was calculated every day. To  
476 test the germination ability of different aged seeds, spikelets were marked at the day anthesis, different aged  
477 seeds were harvested and put into a germination bag in a growth chamber. The germination rate was  
478 investigated at 7 days after imbibition.

479

480 **Assessment of the frequency of autonomous endosperm**

481 The spikelets were emasculated one day before flowering. A pollination bag was used to cover the  
482 emasculated panicle in case cross-pollination. If a caryopsis was enlarged without pollination at 25 days after  
483 the anthesis removed, we regard it as an autonomous endosperm.

484

#### 485 **Acknowledgment**

486 This work was supported by National Key R&D Program of China (2016YFD0100902), National Natural Science  
487 Foundation of China (31771744, 31571623 and 31701392), Science Fund for Distinguished Young Scholars of  
488 Jiangsu Province (BK20180047), and the Priority Academic Development of Jiangsu Higher Education  
489 Institutions. We thank Dr. Dongping Zhang for critical reading of the manuscript.

490

#### 491 **Figure legends**

##### 492 **Figure 1. Evolutionary analysis of FIE homologs of rice.**

493 (A). Phylogenetic tree of the FIE homologs of monocots. EnsemblPlants IDs of the homologs were provided.  
494 The initials of the accession numbers indicate the origin of the gene. All the rice homolog IDs start with "O".  
495 LPRER, AET, HORVU, BRADI, SORBI, Zm, SETIT, GSMUA and Dr indicates *Leersia perrieri*, *Aegilops tauschii*,  
496 *Hordeum vulgare*, *Brachypodium distachyon*, *Sorghum bicolor*, *Zea mays*, *Setaria italica*, *Musa acuminata* and  
497 *Dioscorea rotundata*, respectively. The maximum likelihood method was used for the tree construction.  
498 (B). Violin plot of  $dN/dS$  of different *FIE1* and *FIE2* homologs in the genus *Oryza*. *L. perrieri* was used as an out-  
499 group for the  $dN/dS$  calculations.

500

##### 501 **Figure 2. Deleterious effects of ectopically expressed *OsFIE1* on vegetative growth are dosage dependent.**

502 (A). Phenotype of the wild type (WT) and a representative *OsFIE1*-overexpression line (*Ubi::OsFIE1*) at the  
503 heading stage.

504 (B). Relative expression of *OsFIE1* in leaves of *Ubi::OsFIE1* plants.

505 (C). H3K27me3 was elevated in *Ubi::OsFIE1*.

506 (D). Phenotype of WT and a *proOsFIE2::OsFIE1* line at the heading stage.

507

##### 508 **Figure 3. Ectopic expression of the chimeric *OsFIE* did not result in vegetative defects**

509 (A). Scheme of the chimeric *OsFIEs*, achieved by swapping the extra N-terminal tail of *OsFIE1* to *OsFIE2*. The  
510 green and yellow bars indicated *OsFIE1* and *OsFIE2* proteins, respectively.

511 (B). Confirmation of ectopic expression of the chimeric *OsFIEa* (*Chi-OsFIEa*) and *Chi-OsFIEb* in transgenic  
512 plants. 1-qRT and 2-qRT indicated the segments used to distinguish the *OsFIE1*- and *OsFIE2*-origin transcripts.  
513 The corresponding positions of 1-qRT1 and 2-qRT are indicated in (A). Three biological replicates were used;  
514 the error bars indicated standard deviations.

515 (C, D). Phenotypes of *Chi-OsFIEa-1* (C) line and *Chi-OsFIEb-1* (D) plants at the heading stage.

516 (E, F). Tiller numbers (E) and plant height (F) of different transgenic lines of *Ubi::OsFIE1*, *Chi-OsFIEa* and *Chi-*  
517 *OsFIEb*. Twenty plants for each line were measured; error bars indicate standard deviations.

518

##### 519 **Figure 4. Overexpression of *OsFIE1* resulted in reduced seed size.**

520 (A). Phenotypes of seeds from *Ubi::OsFIE1* and *GT::OsFIE1*.

521 (B). Confirmation of the expression up-regulation of *OsFIE1*, but not *OsFIE2*, in the caryopses (6 days after  
522 fertilization (DAF)) of different *GT1::OsFIE1* transgenic lines.

523 (C). Phenotypes of the wild-type (WT) and *GT::OsFIE1* plants at the heading stage.

524 (D-G). Length (D), width (E), thickness (F) and 1000-grain weight (G) of the brown seeds produced by the



525 *GT1::OsFIE1* lines.  
526

527 **Figure 5. Phenotyping of the *osfie1* mutants.**

528 (A). Illustration of the targets (1-T1 and 1-T2) that were used for generation of CRISPR/Cas9 mutants.  
529 (B). Phenotype of a wild type (WT) plant and two *osfie1* mutants at the heading stage.  
530 (C). Seed phenotype of WT and *osfie1* mutants. Images from top to bottom are WT, *osfie1-1*, *osfie1-2* and  
531 *osfie1-3*, respectively.  
532 (D-G). 1000-grain weight (D), length (E), width (F), and thickness (G) of the brown seeds produced by the  
533 *osfie1* lines.  
534 (H). Reduced dormancy of the *osfie1* mutants.  
535 (I). Dynamic curves of germination of WT, *osfie1-1* and *osfie1-2*.  
536 (J). Germination rate of different-aged seeds of WT, *osfie1-1* and *osfie1-2*.  
537

538 **Figure 6. Generation of *osfie2* mutant.**

539 (A). Schematic drawing of the three targets (2-T1, 2-T2 and 2-T3) that were used for generation of  
540 CRISPR/Cas9 mutants of *osfie2*.  
541 (B). Cumulative percentage of the not-edited (wild type, WT), monoallele-edited (Hetero) and diallele-edited  
542 homozygous (Homo) individuals that were regenerated from *Agrobacterium*-mediated transformation at  $T_0$   
543 generation. The number of individuals of each genotype are indicated on the bars.  
544 (C). Sequencing of 16  $F_2$  individuals derived from  $OsFIE2^{+-}$ .  
545 (D). Cumulative percentage of well-filled, unfilled and unfertilized seeds produced by WT ( $n = 985$ ), *osfie1-1* ( $n$   
546  $= 1768$ ), *osfie1-2* ( $n = 1115$ ),  $OsFIE2^{+-}$  ( $n = 4772$ ) and *osfie1/OsFIE2<sup>+-</sup>* ( $n = 3626$ ).  
547 (H). Caryopses collected from a single panicle of an  $OsFIE2^{+-}$  plant at 15 days after fertilization (DAF). Two  
548 classes of caryopsis were observed: Class 1 that produced starchy endosperm, and Class 2 that produced  
549 watery endosperm.  
550

551 **Figure 7. Early endosperm development of wild type (WT), *osfie1*, *osfie2* and *osfie1,2*.**

552 (A-L). Sections of 2 days after fertilization (DAF) (A-D), 3 DAF (E-H) and 4 DAF (I-L) endosperm of WT (A, E, I),  
553 *osfie1-1* (B, F, J), *osfie2* (C, G, K) and *osfie1,2* (D, H, L).  
554 (M, N). Sections of 7 DAF endosperm of WT (M) and *osfie2* (N).  
555 (O, P).  $I_2$ -KI staining of 7 DAF endosperm of WT (O) and *osfie2* (P).  
556 (Q-X). Expression of some key genes involved in starch biosynthesis. Three biological replicates were used;  
557 error bars indicated standard deviations.  
558

559 **Figure 8. Autonomous fertilization of  $OsFIE2^{+-}$  and *osfie1/OsFIE2<sup>+-</sup>*.**

560 (A). Cumulative percentages of the non-fertilized and autonomously fertilized seeds in wild type (WT), *osfie1-1*,  
561 *osfie1-2*,  $OsFIE2^{+-}$  and *osfie1/OsFIE2<sup>+-</sup>*. The number of each type of seed was indicated on the bars.  
562 (B, C). Morphology of dried autonomous seeds of  $OsFIE2^{+-}$  (B) and *osfie1/OsFIE2<sup>+-</sup>* (C).  
563

564 **Figure 9. Transcriptome analysis of caryopses 5 days after fertilization (5 DAF) of wild type WT, *osfie1*,  
565 *osfie2* and *osfie1,2*.**

566 (A, B). Venn diagrams of the upregulated (A) and down-regulated (B) genes identified from *osfie1*, *osfie2* and  
567 *osfie1,2* in comparison to WT.  
568 (C). MapMan pathway enrichment analysis of the differentially expressed genes (DEGs). Circle size and colors  
569 indicate the log scale of the enrichment.  
570 (D). Heatmap of the expression of DEGs common to *osfie1*, *osfie2* and *osfie1,2*. Gene expression was  
571 indicated by  $\log_2(\text{FPKM})$ .  
572 (E, F). Additive effects of *OsFIE1* and *OsFIE2* on expression of storage protein biosynthesis-related genes (E)  
573 and photosynthesis-related genes (F).

574

575 **Figure 10. Functional divergence between *OsFIE1* and *OsFIE2* with respect to seed development of rice.**

576 Both *OsFIE1* and *OsFIE2* are able to interact with other members to form functional *OsFIE1*- and *OsFIE2*-PRC2.  
577 Whether the same or distinct components are recruited by *OsFIE1* and *OsFIE2* to form a polycomb complex is  
578 not determined. By modulating the H3K27me3 of its target genes, *OsFIE2* acts as a positive regulator of  
579 endosperm cellularization and may also function in terms of starch filling of seeds. *OsFIE1* is less active on the  
580 regulation of cellularization, seed filling and maturation; but is essential for dormancy. It is not clear whether  
581 *OsFIE2* functions on dormancy as well. Dashed lines indicated undetermined components or regulation, and  
582 line thickness indicated importance for regulation.

583

584 **Supplementary Figure 1. Synteny of the chromosomal segments that containing *FIE* homologs among**  
585 **different *Oryzae* species and alignment of *OsFIE1* and *OsFIE2*.**

586

587 **Supplementary Figure 2. Alignment of the N-terminus of *OsFIE1* and *OsFIE2* homologs.**

588

589 **Supplementary Figure 3. Expression profiles and DNA methylation landscapes of *OsFIE1* and *OsFIE2*.**

590

591 **Supplementary Figure 4. Seed phenotype of WT, *osfie1*, *OsFIE2*<sup>+</sup> and *osfie1/OsFIE2*<sup>+</sup> at mature stages.**

592

593 **Supplementary Figure 5. The viability of pollen grains and embryo sac of WT, *osfie1*, *osfie2* and *osfie1,2*.**

594

595 **Supplementary Figure 6. CLSM observation of the embryo development of WT, *osfie2* and *osfie1,2*.**

596

597 **Supplementary Figure 7. Relative expression of some MADS-box genes in the endosperm of WT, *osfie1*,**  
598 ***osfie2* and *osfie1,2*.**

599

600 **Supplementary Table 1. Differentially expressed genes identified from *osfie1*, *osfie2* and *osfie1,2*.**

601

602 **Supplementary Table 2. Additive effects of *OsFIE1* and *OsFIE2* on storage pretein and photosynthesis**  
603 **related genes' expression.**

604

605 **Supplementary Table 3. Primes used in the study.**

606

607 **References**

- 608 **Agarwal P, Kapoor S, Tyagi AK. 2011.** Transcription factors regulating the progression of monocot and dicot seed  
609 development. *BioEssays* **33**: 189–202.
- 610 **Batista RA, Figueiredo DD, Santos-González J, Köhler C. 2019.** Auxin regulates endosperm cellularization in  
611 Arabidopsis. *Genes & Development* **33**: 466–476.
- 612 **Bouyer D, Roudier F, Heese M, Andersen ED, Gey D, Nowack MK, Goodrich J, Renou JP, Grini PE, Colot V, et al.**  
613 **2011.** Polycomb repressive complex 2 controls the embryo-to-seedling phase transition. *PLoS Genetics* **7**.
- 614 **Cao R, Wang L, Wang H, Xia L, Erdjument-Bromage H, Tempst P, Jones RS, Zhang Y. 2002.** Role of Histone H3  
615 Lysine 27 Methylation in Polycomb-Group Silencing. *Science* **298**: 1039–1043.
- 616 **Chaudhury AM, Ming L, Miller C, Craig S, Dennis ES, Peacock WJ. 1997.** Fertilization-independent seed  
617 development in Arabidopsis thaliana. *Proceedings of the National Academy of Sciences of the United States of*  
618 *America* **94**: 4223–4228.
- 619 **Chen C, Begcy K, Liu K, Folsom JJ, Wang Z, Zhang C, Walia H. 2016a.** Heat stress yields a unique MADS box  
620 transcription factor in determining seed size and thermal sensitivity. *Plant Physiology* **171**: 606–622.
- 621 **Chen C, EZ, Lin H. 2016b.** Evolution and Molecular Control of Hybrid Incompatibility in Plants. *Frontiers in Plant*  
622 *Science* **7**: 1208.
- 623 **Chen C, Li T, Zhu S, Liu Z, Shi Z, Zheng X, Chen R, Huang J, Shen Y, Luo S, et al. 2018a.** Characterization of  
624 Imprinted Genes in Rice Reveals Conservation of Regulation and Imprinting with Other Plant Species. *Plant*  
625 *Physiology* **177**: 1754–1771.
- 626 **Chen C, Xia R, Chen H, He Y. 2018b.** TBtools, a Toolkit for Biologists integrating various biological data handling  
627 tools with a user-friendly interface. *bioRxiv*.
- 628 **Chen M, Xie S, Ouyang Y, Yao J. 2017.** Rice PcG gene OsEMF2b controls seed dormancy and seedling growth by  
629 regulating the expression of OsVP1. *Plant Science* **260**: 80–89.
- 630 **Danilevskaya ON, Hermon P, Hantke S, Muszynski MG, Kollipara K, Ananiev E V. 2003a.** Duplicated fie genes in  
631 maize: expression pattern and imprinting suggest distinct functions. *Plant Cell* **15**: 425–438.
- 632 **Danilevskaya ON, Hermon P, Hantke S, Muszynski MG, Kollipara K, Ananiev E V. 2003b.** Duplicated fie genes in  
633 maize: expression pattern and imprinting suggest distinct functions. *Plant Cell* **15**: 425–438.
- 634 **Deng X, Song X, Wei L, Liu C, Cao X. 2016.** Epigenetic regulation and epigenomic landscape in rice. *National Science*  
635 *Review* **3**: 309–327.
- 636 **Figueiredo DD, Batista RA, Roszak PJ, Hennig L, Köhler C. 2016.** Auxin production in the endosperm drives seed  
637 coat development in Arabidopsis. *eLife* **5**: 1–23.
- 638 **Figueiredo DD, Batista RA, Roszak PJ, Köhler C. 2015.** Auxin production couples endosperm development to  
639 fertilization. *Nature Plants*: 15184.
- 640 **Figueiredo DD, Köhler C. 2018.** Auxin: a molecular trigger of seed development. *Genes & development* **32**: 479–  
641 490.

- 642 **Folsom JJ, Begcy K, Hao X, Wang D, Walia H. 2014.** Rice Fertilization-Independent Endosperm1 Regulates Seed Size  
643 under Heat Stress by Controlling Early Endosperm Development. *Plant Physiology* **165**: 238–248.
- 644 **Furihata HY, Suenaga K, Kawanabe T. 2016.** Gene duplication, silencing and expression alteration govern the  
645 molecular evolution of PRC2 genes in plants. : 85–95.
- 646 **Grossniklaus U, Vielle-Calzada JP, Hoepfner MA, Gagliano WB. 1998.** Maternal control of embryogenesis by  
647 MEDEA, a polycomb group gene in Arabidopsis. *Science (New York, N.Y.)* **280**: 446–450.
- 648 **Gruntman E, Qi Y, Slotkin RK, Roeder T, Martienssen RA, Sachidanandam R. 2008.** Kismeth: Analyzer of plant  
649 methylation states through bisulfite sequencing. *BMC Bioinformatics* **9**: 371.
- 650 **Hara T, Katoh H, Ogawa D, Kagaya Y, Sato Y, Kitano H, Nagato Y, Ishikawa R, Ono A, Kinoshita T, et al. 2015.** Rice  
651 SNF2 family helicase ENL1 is essential for syncytial endosperm development. *The Plant Journal* **81**: 1–12.
- 652 **Hennig L. 2003.** Arabidopsis MSI1 is required for epigenetic maintenance of reproductive development.  
653 *Development* **130**: 2555–2565.
- 654 **Horton RM, Cai Z, Ho SM, Pease LR. 2013.** Gene splicing by overlap extension: tailor-made genes using the  
655 polymerase chain reaction. *BioTechniques* **54**: 129–33.
- 656 **Huang X, Lu Z, Wang X, Ouyang Y, Chen W, Xie K, Wang D, Luo M, Luo J, Yao J. 2016.** Imprinted gene OsFIE1  
657 modulates rice seed development by influencing nutrient metabolism and modifying genome H3K27me3. *The*  
658 *Plant journal: for cell and molecular biology* **87**: 305–317.
- 659 **Ishikawa R, Ohnishi T, Kinoshita Y, Eiguchi M, Kurata N, Kinoshita T. 2011.** Rice interspecies hybrids show  
660 precocious or delayed developmental transitions in the endosperm without change to the rate of syncytial nuclear  
661 division. *The Plant journal: for cell and molecular biology* **65**: 798–806.
- 662 **Kang I-H, Steffen JG, Portereiko MF, Lloyd A, Drews GN. 2008.** The AGL62 MADS Domain Protein Regulates  
663 Cellularization during Endosperm Development in Arabidopsis. *The Plant Cell* **20**: 635–647.
- 664 **Kapazoglou A, Tondelli A, Papaefthimiou D, Ampatzidou H, Francia E, Stanca M a, Bladenopoulos K, Tsiftaris AS.**  
665 **2010.** Epigenetic chromatin modifiers in barley: IV. The study of barley Polycomb group (PcG) genes during seed  
666 development and in response to external ABA. *BMC Plant Biology* **10**: 73.
- 667 **Kawabe A, Fujimoto R, Charlesworth D. 2007.** High Diversity Due to Balancing Selection in the Promoter Region of  
668 the Medea Gene in Arabidopsis lyrata. *Current Biology* **17**: 1885–1889.
- 669 **Kellogg EA. 2009.** The evolutionary history of Ehrhartoideae, Oryzeae, and Oryza. *Rice* **2**: 1–14.
- 670 **Kiyosue T, Ohad N, Yadegari R, Hannon M, Dinneny J, Wells D, Katz A, Margossian L, Harada JJ, Goldberg RB, et**  
671 **al. 1999.** Control of fertilization-independent endosperm development by the MEDEA polycomb gene in  
672 Arabidopsis. *Proceedings of the National Academy of Sciences* **96**: 4186–4191.
- 673 **Köhler C, Hennig L, Spillane C, Pien S, Gruissem W, Grossniklaus U. 2003.** The Polycomb-group protein MEDEA  
674 regulates seed development by controlling expression of the MADS-box gene PHERES1. *Genes and Development* **17**:  
675 1540–1553.
- 676 **Kradolfer D, Wolff P, Jiang H, Siretskiy A, Kohler C. 2013.** An imprinted gene underlies postzygotic reproductive

677 isolation in *Arabidopsis thaliana*. *Dev Cell* **26**: 525–535.

678 **Lang Z, Wang Y, Tang K, Tang D, Datsenka T, Cheng J, Zhang Y, Handa AK, Zhu J-K. 2017.** Critical roles of DNA  
679 demethylation in the activation of ripening-induced genes and inhibition of ripening-repressed genes in tomato  
680 fruit. *Proceedings of the National Academy of Sciences* **114**: E4511–E4519.

681 **Li S, Zhou B, Peng X, Kuang Q, Huang X, Yao J, Du B, Sun M-X. 2014.** OsFIE2 plays an essential role in the  
682 regulation of rice vegetative and reproductive development. *New Phytologist* **201**: 66–79.

683 **Liu X, Wei X, Sheng Z, Jiao G, Tang S, Luo J, Hu P. 2016.** Polycomb Protein OsFIE2 Affects Plant Height and Grain  
684 Yield in Rice. *Plos One* **11**: e0164748.

685 **Luo M, Bilodeau P, Dennis ES, Peacock WJ, Chaudhury A. 2000.** Expression and parent-of-origin effects for FIS2,  
686 MEA, and FIE in the endosperm and embryo of developing *Arabidopsis* seeds. *Proc Natl Acad Sci U S A* **97**: 10637–  
687 10642.

688 **Luo M, Platten D, Chaudhury A, Peacock WJ, Dennis ES. 2009.** Expression, imprinting, and evolution of rice  
689 homologs of the polycomb group genes. *Mol Plant* **2**: 711–723.

690 **Miyake T, Takebayashi N, Wolf DE. 2009.** Possible diversifying selection in the imprinted gene, MEDEA, in  
691 *Arabidopsis*. *Molecular Biology and Evolution* **26**: 843–857.

692 **Mozgova I, Hennig L. 2015.** The Polycomb Group Protein Regulatory Network. *Annual Review of Plant Biology* **66**:  
693 269–296.

694 **Mozgova I, Köhler C, Hennig L. 2015.** Keeping the gate closed: functions of the polycomb repressive complex PRC2  
695 in development. *The Plant Journal* **83**: 121–132.

696 **Nallamilli BR, Zhang J, Mujahid H, Malone BM, Bridges SM, Peng Z. 2013.** Polycomb group gene OsFIE2 regulates  
697 rice (*Oryza sativa*) seed development and grain filling via a mechanism distinct from *Arabidopsis*. *PLoS Genet* **9**:  
698 e1003322.

699 **Ohad N, Margossian L, Hsu YC, Williams C, Repetti P, Fischer RL. 1996.** A mutation that allows endosperm  
700 development without fertilization. *Proceedings of the National Academy of Sciences of the United States of*  
701 *America* **93**: 5319–5324.

702 **Olsen O-A. 2001.** ENDOSPERM DEVELOPMENT: Cellularization and Cell Fate Specification. *Annual review of plant*  
703 *physiology and plant molecular biology* **52**: 233–267.

704 **Olsen O-A. 2004.** Nuclear endosperm development in cereals and *Arabidopsis thaliana*. *The Plant cell* **16 Suppl**:  
705 S214–S227.

706 **Pires ND. 2014.** Seed evolution: parental conflicts in a multi-generational household. *Biomolecular concepts* **5**: 71–  
707 86.

708 **Portereiko MF, Lloyd A, Steffen JG, Punwani JA, Otsuga D, Drews GN. 2006.** AGL80 Is Required for Central Cell  
709 and Endosperm Development in *Arabidopsis*. **18**: 1862–1872.

710 **Roszak P, Kohler C. 2011.** Polycomb group proteins are required to couple seed coat initiation to fertilization.  
711 *Proceedings of the National Academy of Sciences* **108**: 20826–20831.

712 **Russell DA, Fromm ME. 1997.** Tissue-specific expression in transgenic maize of four endosperm promoters from  
713 maize and rice. *Transgenic research* **6**: 157–168.

714 **Spillane C, Schmid KJ, Laoueuillé-Duprat S, Pien S, Escobar-Restrepo J-M, Baroux C, Gagliardini V, Page DR, Wolfe**  
715 **KH, Grossniklaus U. 2007.** Positive darwinian selection at the imprinted MEDEA locus in plants. *Nature* **448**: 349–  
716 352.

717 **Tonosaki K, Kinoshita T. 2015.** Possible roles for polycomb repressive complex 2 in cereal endosperm. *Frontiers in*  
718 *Plant Science* **6**: 1–5.

719 **Tonosaki K, Sekine D, Ohnishi T, Ono A, Furuumi H, Kurata N, Kinoshita T. 2018.** Overcoming the species  
720 hybridization barrier by ploidy manipulation in the genus *Oryza*. *Plant Journal* **93**: 534–544.

721 **Vinkenoog R, Spielman M, Adams S, Fischer RL, Dickinson HG, Rod J. Scott. 2000.** Hypomethylation promotes  
722 autonomous endosperm development and rescues postfertilization lethality in *ma* mutants. *The Plant Cell* **12**:  
723 2271–2282.

724 **Walia H, Josefsson C, Dilkes B, Kirkbride R, Harada J, Comai L. 2009.** Dosage-Dependent Deregulation of an  
725 AGAMOUS-LIKE Gene Cluster Contributes to Interspecific Incompatibility. *Current Biology* **19**: 1128–1132.

726 **Wu X, Liu J, Li D, Liu C-M. 2016.** Rice caryopsis development II: Dynamic changes in the endosperm. *Journal of*  
727 *Integrative Plant Biology* **58**: 786–798.

728 **Yang J, Lee S, Hang R, Kim SR, Lee YS, Cao X, Amasino R, An G. 2013.** OsVIL2 functions with PRC2 to induce  
729 flowering by repressing *O s* LFL 1 in rice. *Plant Journal* **73**: 566–578.

730 **Zhang L, Cheng Z, Qin R, Qiu Y, Wang J-L, Cui X, Gu L, Zhang X, Guo X, Wang D, et al. 2012.** Identification and  
731 Characterization of an Epi-Allele of FIE1 Reveals a Regulatory Linkage between Two Epigenetic Marks in Rice. *The*  
732 *Plant Cell* **24**: 4407–4421.

733 **Zhang S, Wang D, Zhang H, Skaggs MI, Lloyd A, Ran D, An L, Schumaker KS, Drews GN, Yadegari R. 2018.**  
734 FERTILIZATION-INDEPENDENT SEED-Polycomb Repressive Complex 2 Plays a Dual Role in Regulating Type I MADS-  
735 Box Genes in Early Endosperm Development. *Plant physiology* **177**: 285–299.

736 **Zhao Z, Zhang Y, Liu X, Zhang X, Liu S, Yu X, Ren Y, Zheng X, Zhou K, Jiang L, et al. 2013.** A Role for a Dioxygenase  
737 in Auxin Metabolism and Reproductive Development in Rice. *Developmental Cell* **27**: 113–122.

738

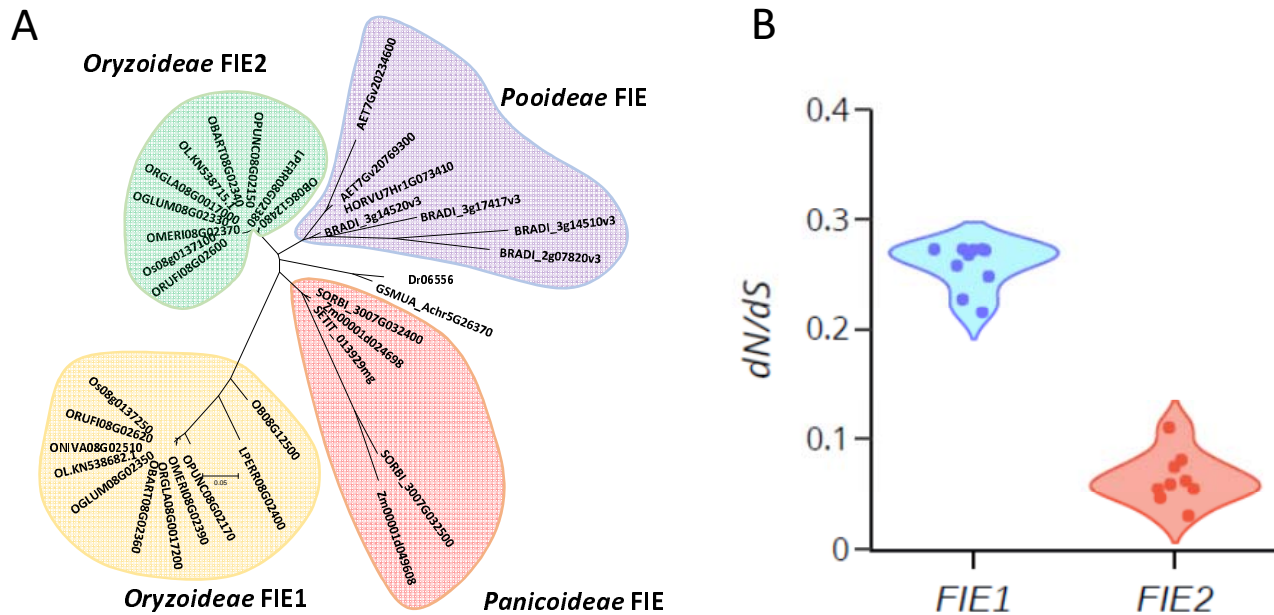

**Figure 1. Evolutionary analysis of FIE homologs of rice.**

(A). Phylogenetic tree of the FIE homologs of monocots. EnsemblPlants IDs of the homologs were provided. The initials of the accession numbers indicate the origin of the gene. All the rice homolog IDs start with “O”. LPRER, AET, HORVU, BRADI, SORBI, Zm, SETIT, GSMUA and Dr indicates *Leersia perrieri*, *Aegilops tauschii*, *Hordeum vulgare*, *Brachypodium distachyon*, *Sorghum bicolor*, *Zea mays*, *Setaria italica*, *Musa acuminata* and *Dioscorea rotundata*, respectively. The maximum likelihood method was used for the tree construction.

(B). Violin plot of  $dN/dS$  of different *FIE1* and *FIE2* homologs in the genus *Oryza*. *L. perrieri* was used as an out-group for the  $dN/dS$  calculations.

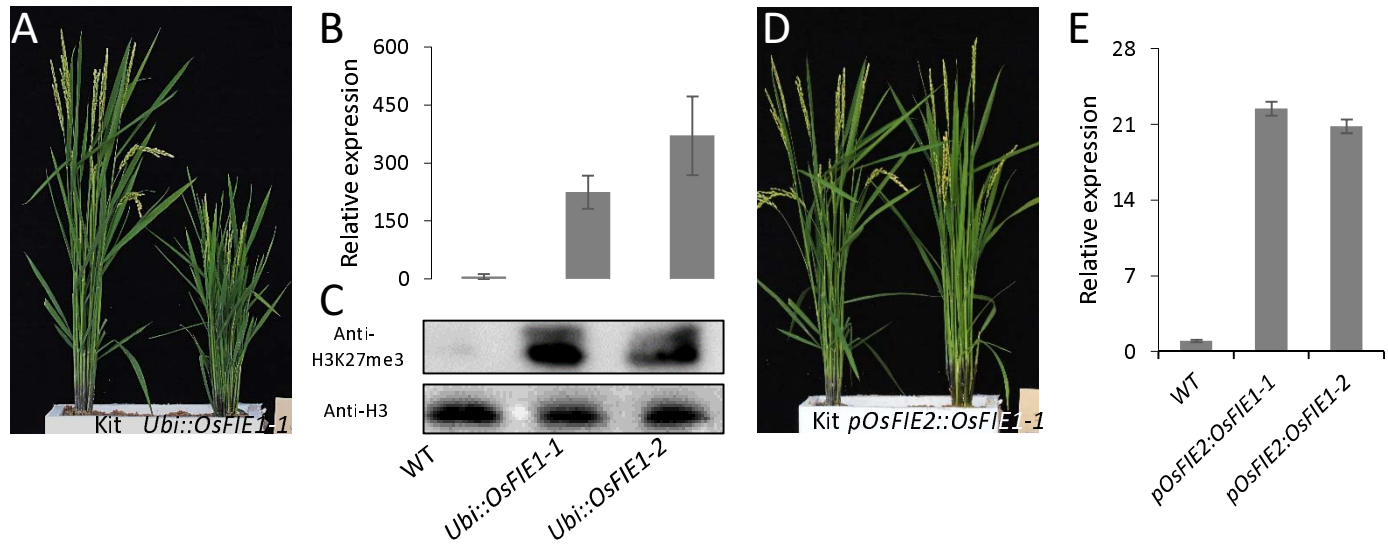

**Figure 2. Deleterious effects of ectopically expressed *OsFIE1* on vegetative growth are dosage dependent.**

(A). Phenotype of the wild type (WT) and a representative *OsFIE1*-overexpression line (*Ubi::OsFIE1*) at the heading stage.

(B). Relative expression of *OsFIE1* in leaves of *Ubi::OsFIE1* plants.

(C). H3K27me3 was elevated in *Ubi::OsFIE1*.

(D). Phenotype of WT and a *proOsFIE2::OsFIE1* line at the heading stage.

(E). Relative expression of *OsFIE1* in leaves of *pOsFIE2::OsFIE1* plants.



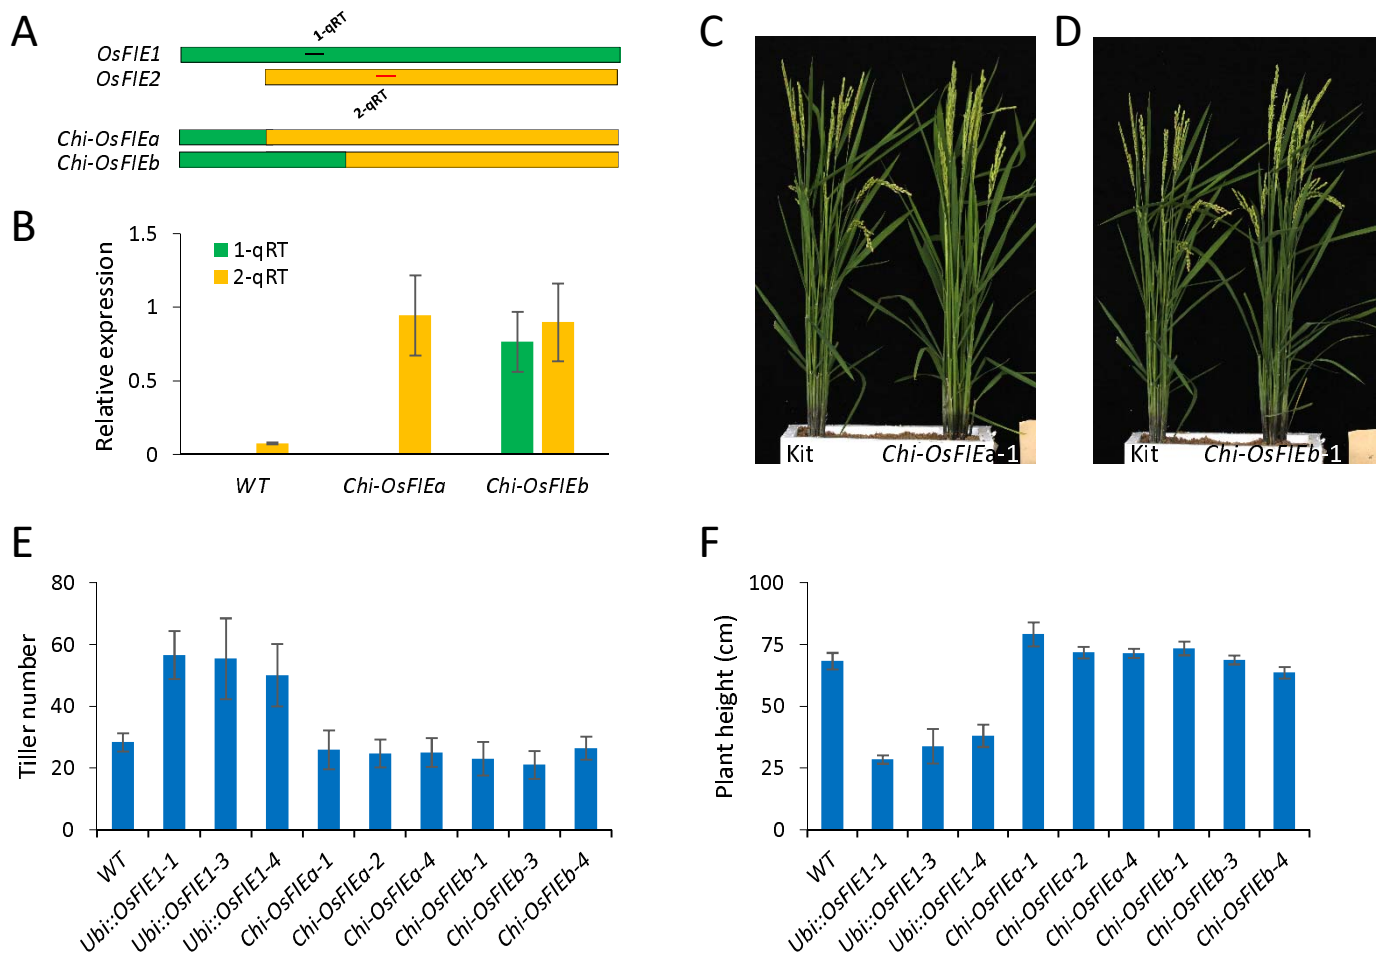

**Figure 3. Ectopic expression of the chimeric *OsFIE* did not result in vegetative defects**

(A). Scheme of the chimeric *OsFIE*s, achieved by swapping the extra N-terminal tail of *OsFIE1* to *OsFIE2*. The green and yellow bars indicated *OsFIE1* and *OsFIE2* proteins, respectively.

(B). Confirmation of ectopic expression of the chimeric *OsFIEa* (*Chi-OsFIEa*) and *Chi-OsFIEb* in transgenic plants. 1-qRT and 2-qRT indicated the segments used to distinguish the *OsFIE1*- and *OsFIE2*-origin transcripts. The corresponding positions of 1-qRT1 and 2-qRT are indicated in (A). Three biological replicates were used; the error bars indicated standard deviations.

(C, D). Phenotypes of *Chi-OsFIEa-1* (C) line and *Chi-OsFIEb-1* (D) plants at the heading stage.

(E, F). Tiller numbers (E) and plant height (F) of different transgenic lines of *Ubi::OsFIE1*, *Chi-OsFIEa* and *Chi-OsFIEb*. Twenty plants for each line were measured; error bars indicate standard deviations.

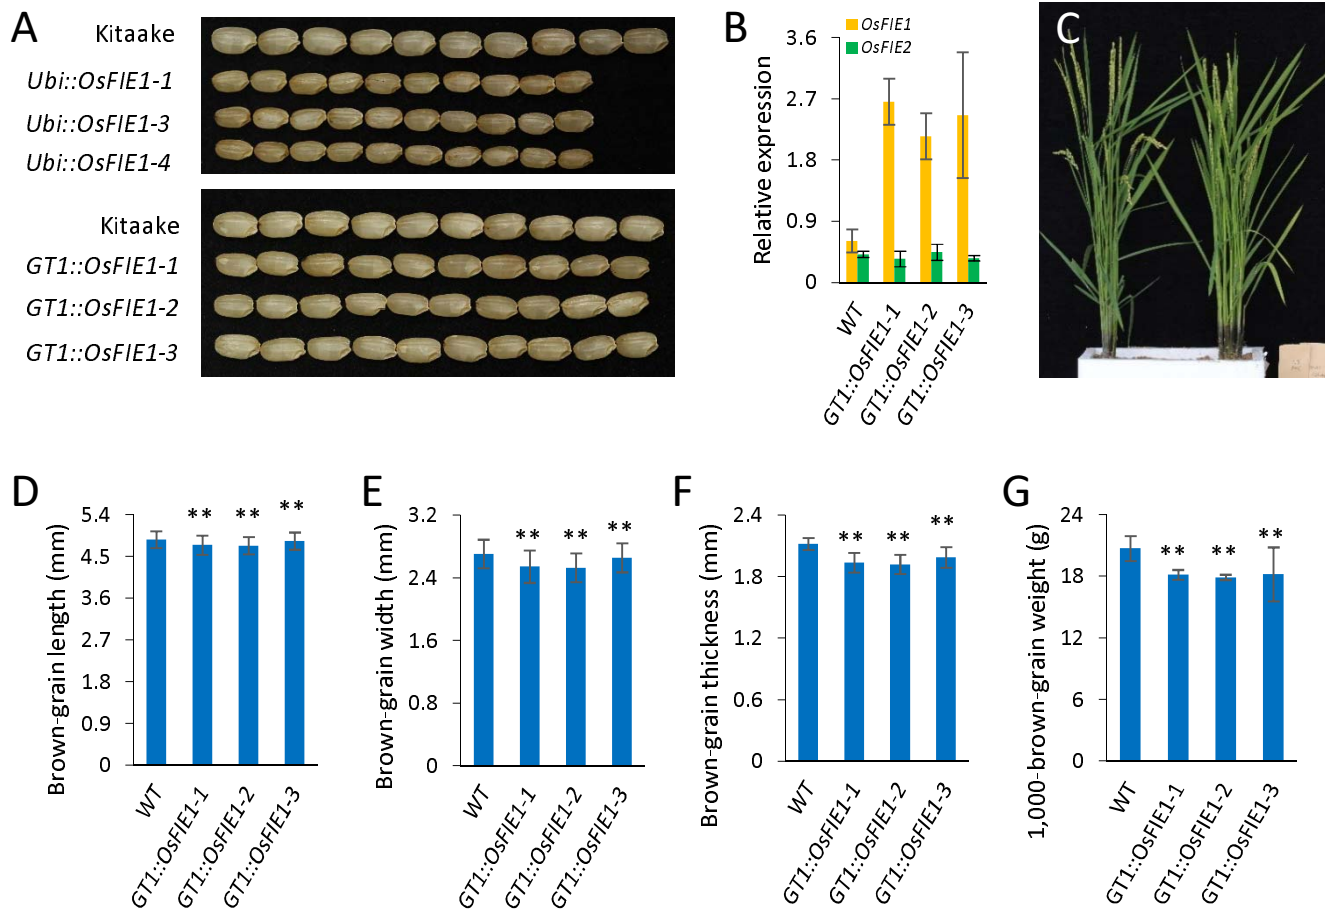

**Figure 4. Overexpression of *OsFIE1* resulted in reduced seed size.**

(A). Phenotypes of seeds from *Ubi::OsFIE1* and *GT1::OsFIE1*.

(B). Confirmation of the expression up-regulation of *OsFIE1*, but not *OsFIE2*, in the caryopses (6 days after fertilization (DAF)) of different *GT1::OsFIE1* transgenic lines.

(C). Phenotypes of the wild-type (WT) and *GT1::OsFIE1* plants at the heading stage.

(D-G). Length (D), width (E), thickness (F) and 1000-grain weight (G) of the brown seeds produced by the *GT1::OsFIE1* lines.

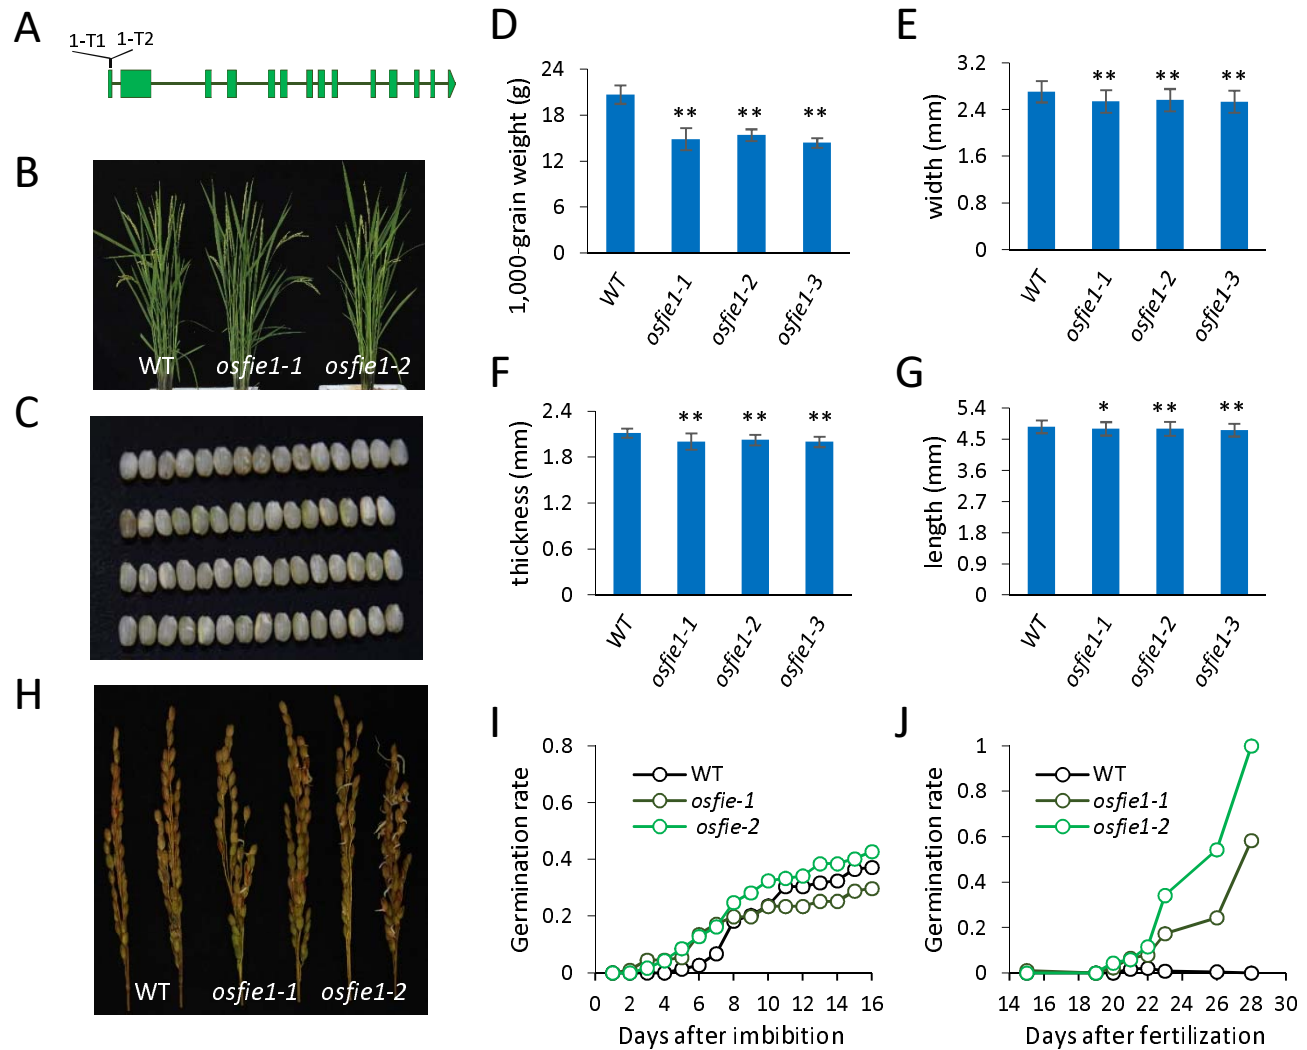

**Figure 5. Phenotyping of the *osfie1* mutants.**

(A). Illustration of the targets (1-T1 and 1-T2) that were used for generation of CRISPR/Cas9 mutants.

(B). Phenotype of a wild type (WT) plant and two *osfie1* mutants at the heading stage.

(C). Seed phenotype of WT and *osfie1* mutants. Images from top to bottom are WT, *osfie1-1*, *osfie1-2* and *osfie1-3*, respectively.

(D-G). 1000-grain weight (D), length (E), width (F), and thickness (G) of the brown seeds produced by the *osfie1* lines.

(H). Reduced dormancy of the *osfie1* mutants.

(I). Dynamic curves of germination of WT, *osfie1-1* and *osfie1-2*.

(J). Germination rate of different-aged seeds of WT, *osfie1-1* and *osfie1-2*.

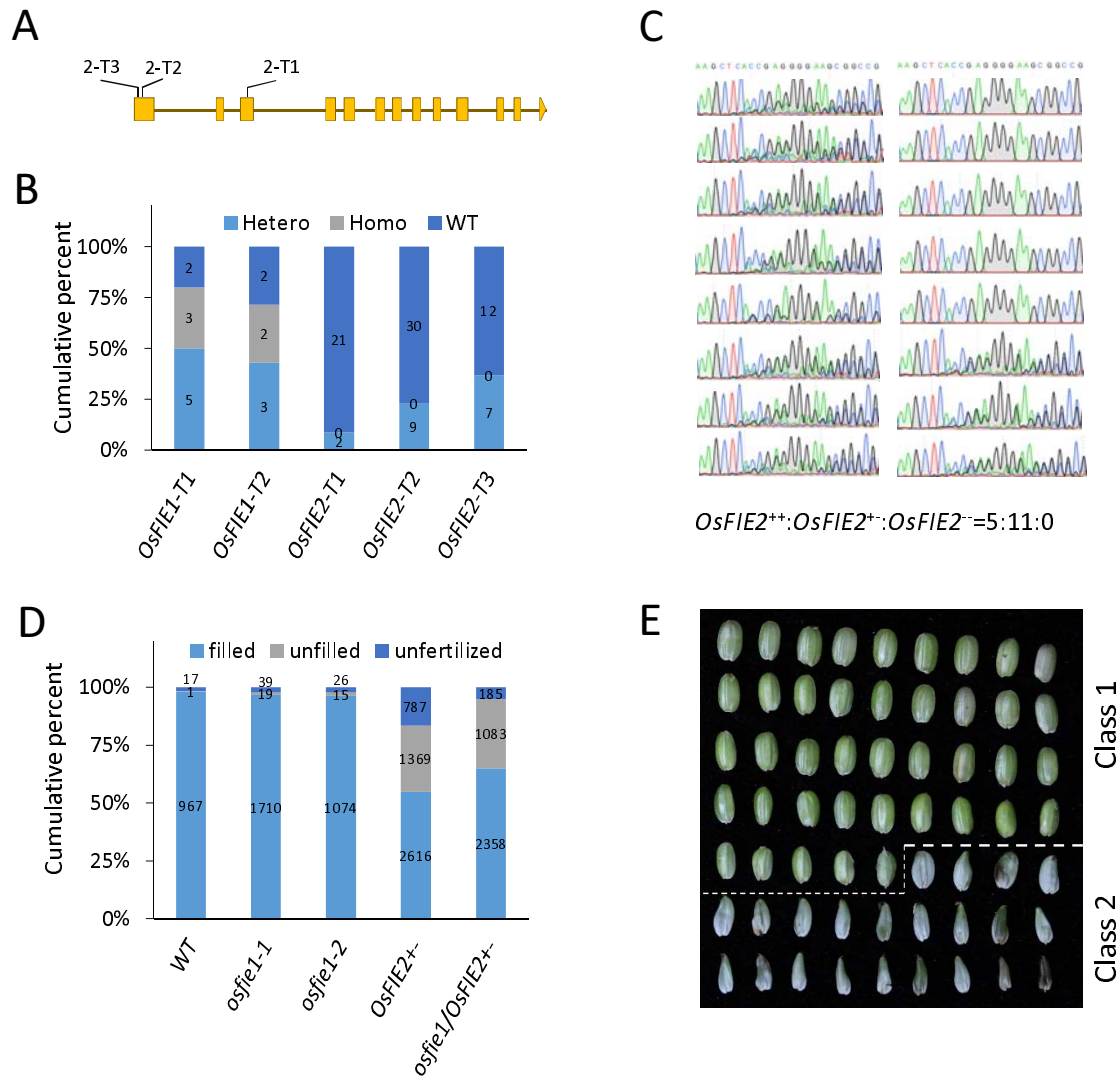

**Figure 6. *osfie2* and *osfie1,2* mutants were leathal.**

(A). Schematic drawing of the three targets (2-T1, 2-T2 and 2-T3) that were used for generation of CRISPR/Cas9 mutants of *osfie2*.

(B). Cumulative percentage of the not-edited (wild type, WT), monoallele-edited (Hetero) and diallele-edited homozygous (Homo) individuals that were regenerated from *Agrobacterium*-mediated transformation at  $T_0$  generation. The number of individuals of each genotype are indicated on the bars.

(C). Sequencing of 16  $F_2$  individuals derived from  $OsFIE2^{+/+}$ .

(D). Cumulative percentage of well-filled, unfilled and unfertilized seeds produced by WT (n = 985), *osfie1-1* (n = 1768), *osfie1-2* (n = 1115),  $OsFIE2^{+/-}$  (n = 4772) and *osfie1/OsFIE2^{+/-} (n = 3626).*

(H). Caryopses collected from a single panicle of an  $OsFIE2^{+/-}$  plant at 15 days after fertilization (DAF). Two classes of caryopsis were observed: Class 1 that produced starchy endosperm, and Class 2 that produced watery endosperm.



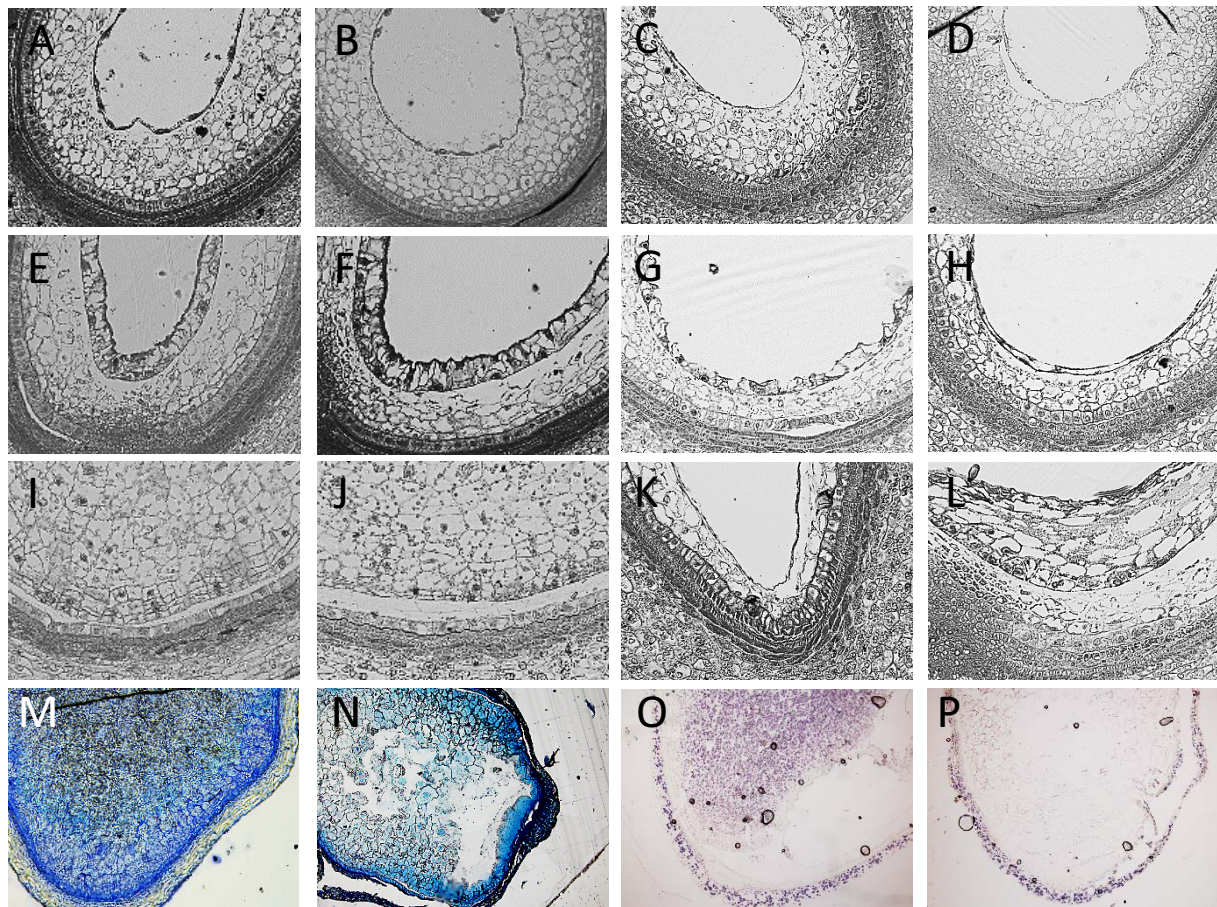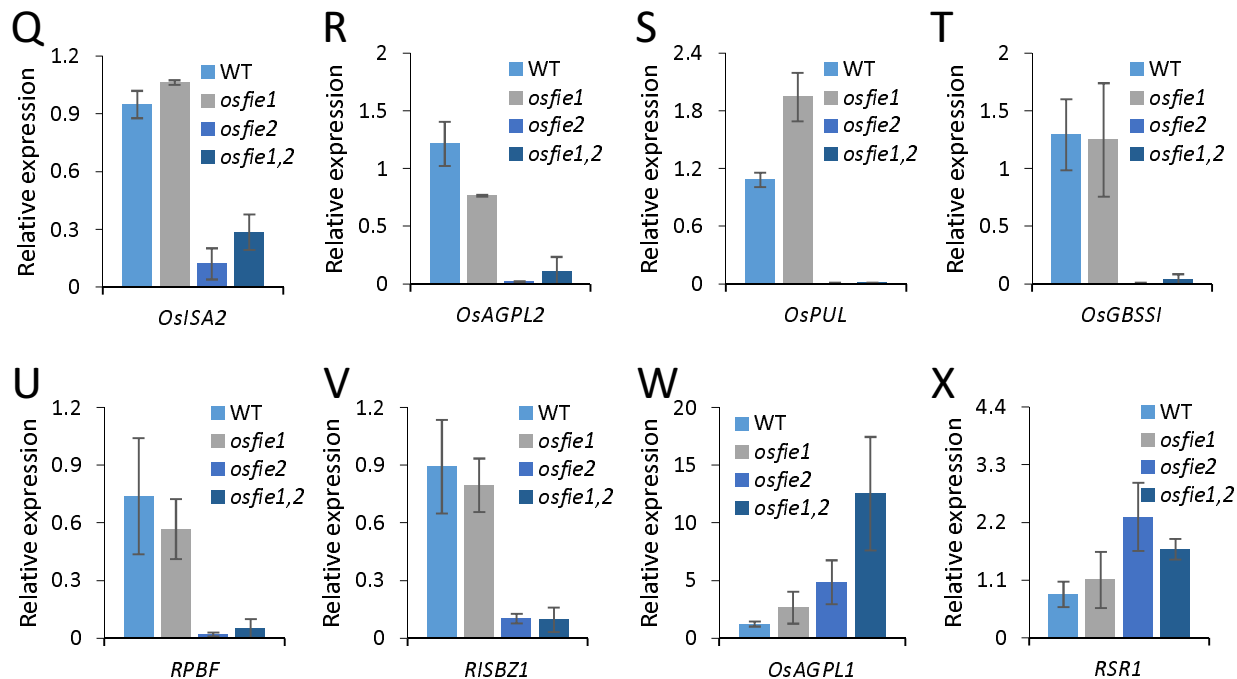

**Figure 7. Early endosperm development of wild type (WT), *osfie1*, *osfie2* and *osfie1,2*.**

(A-L). Sections of 2 days after fertilization (DAF) (A-D), 3 DAF (E-H) and 4 DAF (I-L) endosperm of WT (A, E, I), *osfie1-1* (B, F, J), *osfie2* (C, G, K) and *osfie1,2* (D, H, L).

(M, N). Sections of 7 DAF endosperm of WT (M) and *osfie2* (N).

(O, P). I<sub>2</sub>-KI staining of 7 DAF endosperm of WT (O) and *osfie2* (P).

(Q-X). Expression of some key genes involved in starch biosynthesis. Three biological replicates were used; error bars indicated standard deviations.

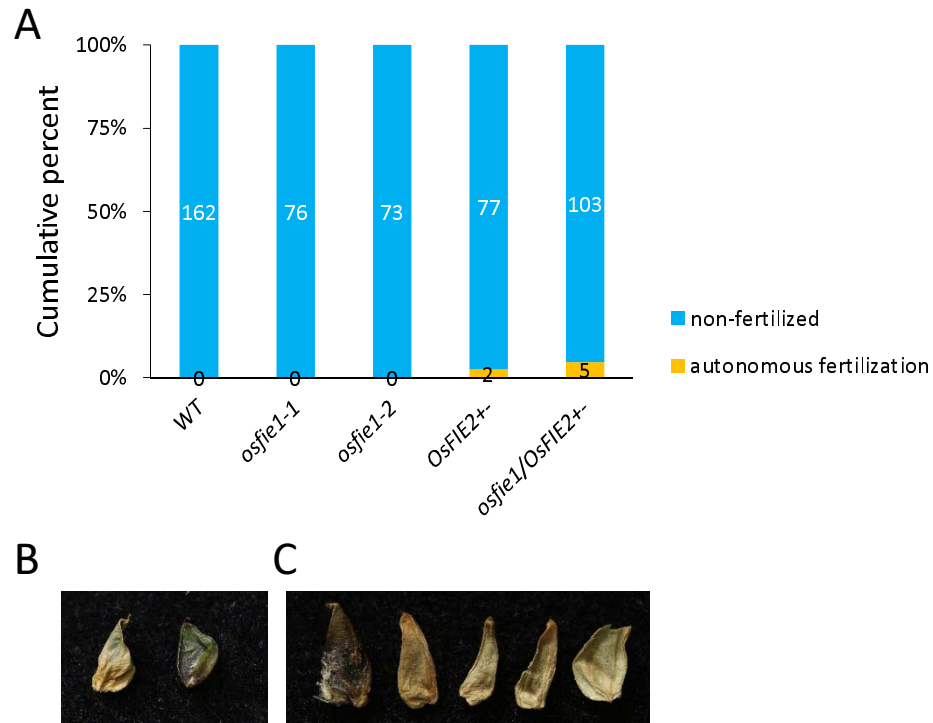

**Figure 8. Autonomous fertilization of *OsFIE2<sup>+/-</sup>* and *osfie1/OsFIE2<sup>+/-</sup>*.**

(A). Cumulative percentages of the non-fertilized and autonomously fertilized seeds in wild type (WT), *osfie1-1*, *osfie1-2*, *OsFIE2<sup>+/-</sup>* and *osfie1/OsFIE2<sup>+/-</sup>*. The number of each type of seed was indicated on the bars.

(B, C). Morphology of dried autonomous seeds of *OsFIE2<sup>+/-</sup>* (B) and *osfie1/OsFIE2<sup>+/-</sup>* (C).

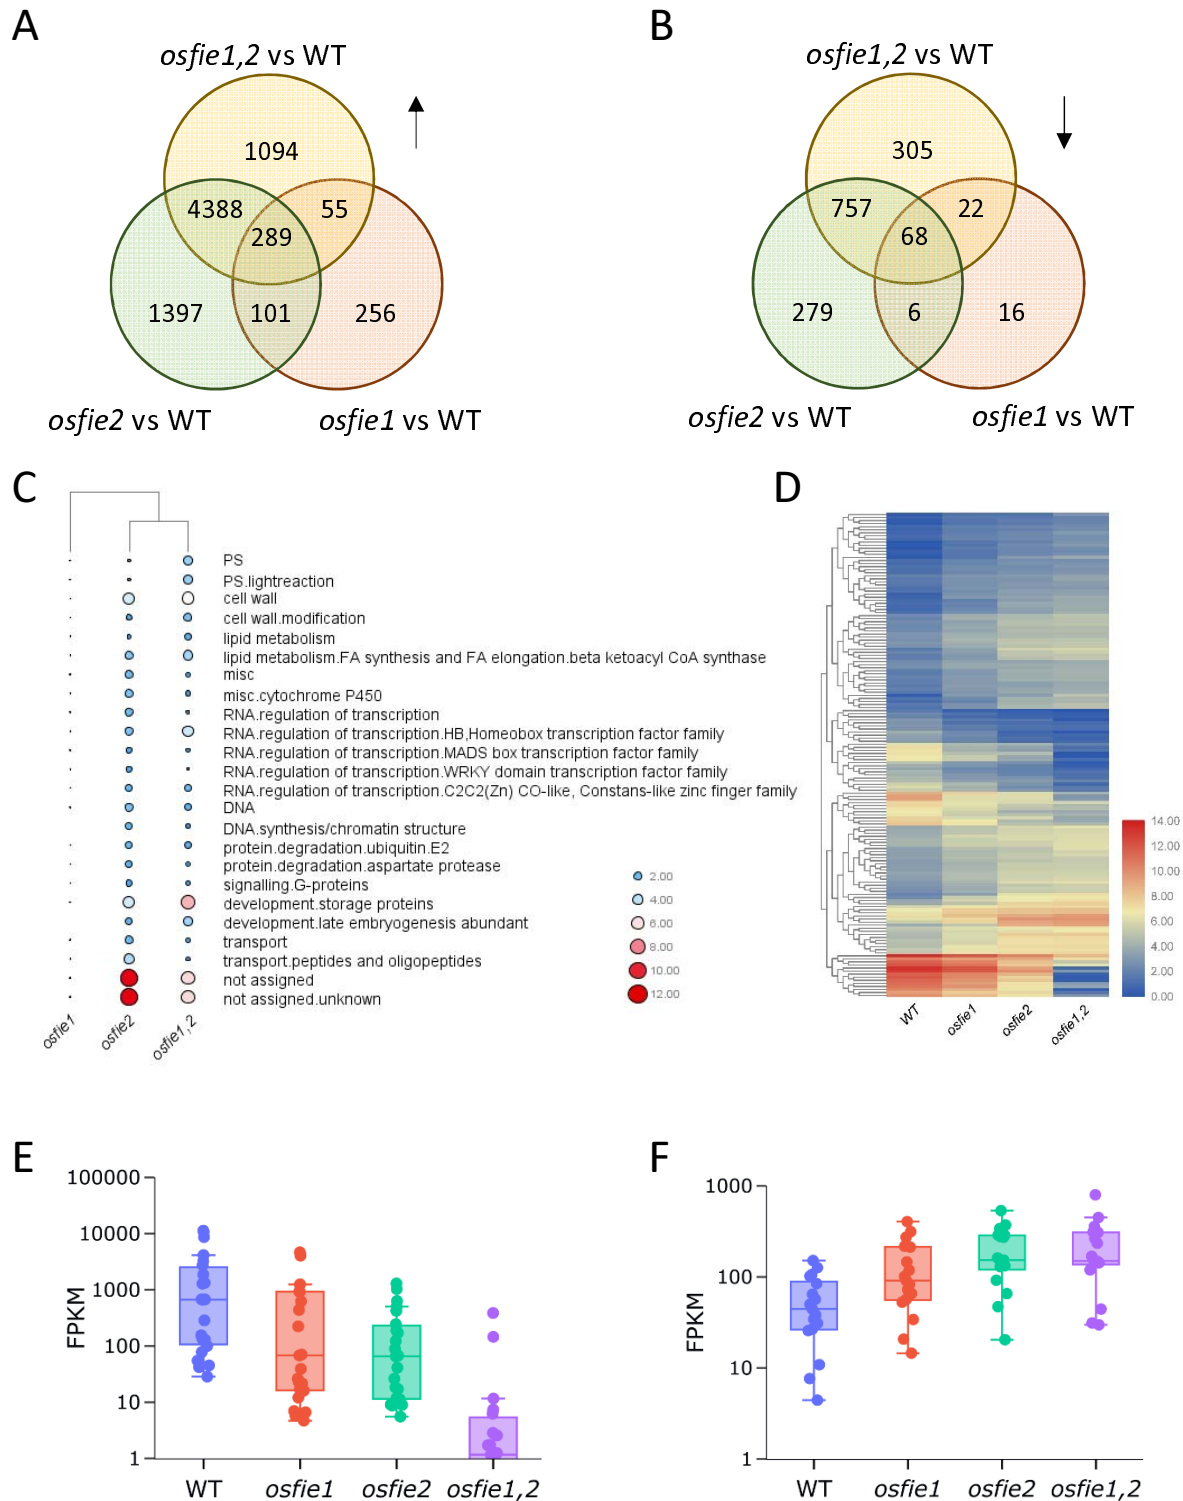

**Figure 9. Transcriptome analysis of caryopses 5 days after fertilization (5 DAF) of wild type WT, *osfie1*, *osfie2* and *osfie1,2*.**

(A, B). Venn diagrams of the upregulated (A) and down-regulated (B) genes identified from *osfie1*, *osfie2* and *osfie1,2* in comparison to WT.

(C). MapMan pathway enrichment analysis of the differentially expressed genes (DEGs). Circle size and colors indicate the log scale of the enrichment.

(D). Heatmap of the expression of DEGs common to *osfie1*, *osfie2* and *osfie1,2*. Gene expression was indicated by  $\log_2(\text{FPKM})$ , Fragments Per Kilobase of transcript per Million fragments mapped).

(E, F). Additive effects of *OsFIE1* and *OsFIE2* on expression of storage protein biosynthesis-related genes (E) and photosynthesis-related genes (F).

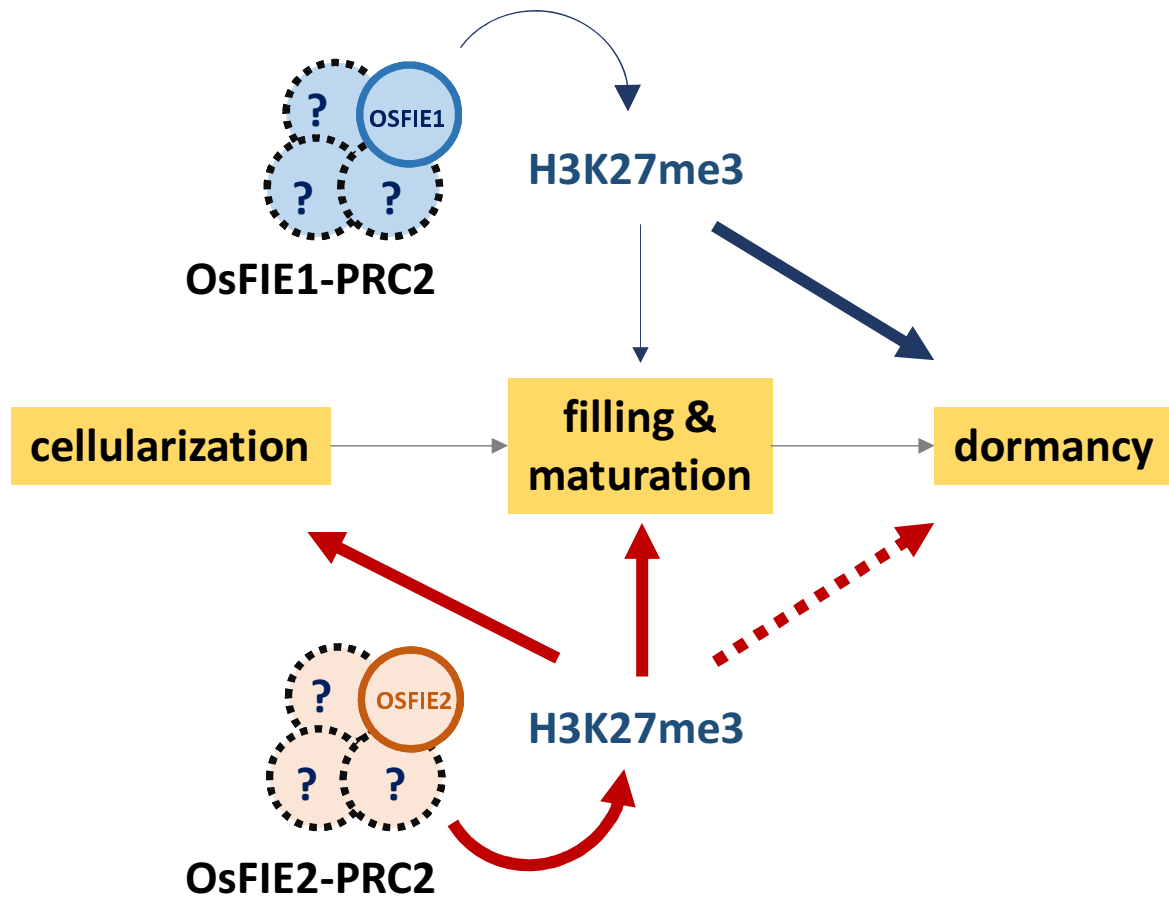

**Figure 10. Functional divergence between *OsFIE1* and *OsFIE2* with respect to seed development of rice.**

Both *OsFIE1* and *OsFIE2* are able to interact with other members to form functional *OsFIE1*- and *OsFIE2*-PRC2. Whether the same or distinct components are recruited by *OsFIE1* and *OsFIE2* to form a polycomb complex is not determined. By modulating the H3K27me3 of its target genes, *OsFIE2* acts as a positive regulator of endosperm cellularization and may also function in terms of starch filling of seeds. *OsFIE1* is less active on the regulation of cellularization, seed filling and maturation; but is essential for dormancy. It is not clear whether *OsFIE2* functions on dormancy as well. Dashed lines indicated undetermined components or regulation, and line thickness indicated importance for regulation.



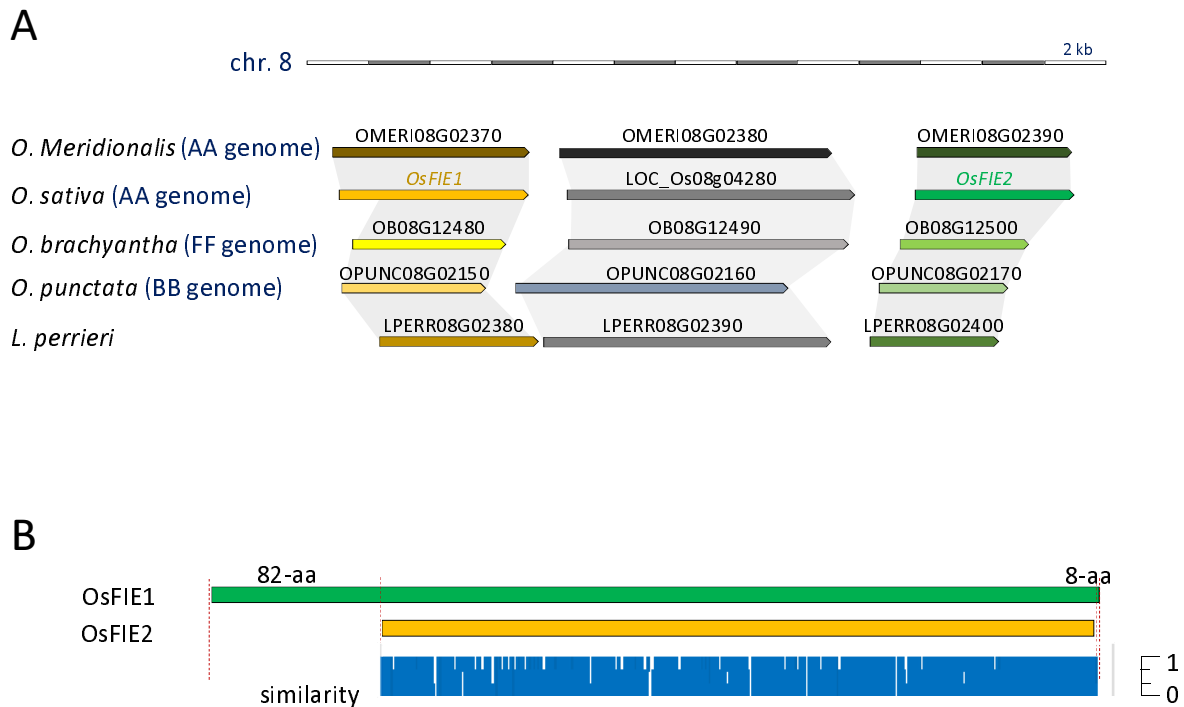

**Supplementary Figure 1. Synteny of the chromosomal segments that containing *FIE* homologs among different *Oryzae* species and alignment of *OsFIE1* and *OsFIE2*.**

(A). Synteny among *O. sativa*, *O. Meridionalis*, *O. brachyantha*, *O. punctata* and *L. perrieri* of the chromosomal segment that embedded the duplicated *FIE* homologs.

(B). Alignment of *OsFIE1* and *OsFIE2*. *OsFIE1* has an extra N-terminal segment that consists 82 amino acid residuals (aa) and an extra C-terminal segment that consists 8 aa. The similarities between *OsFIE1* and *OsFIE2* at corresponding positions are indicated by blue bars.



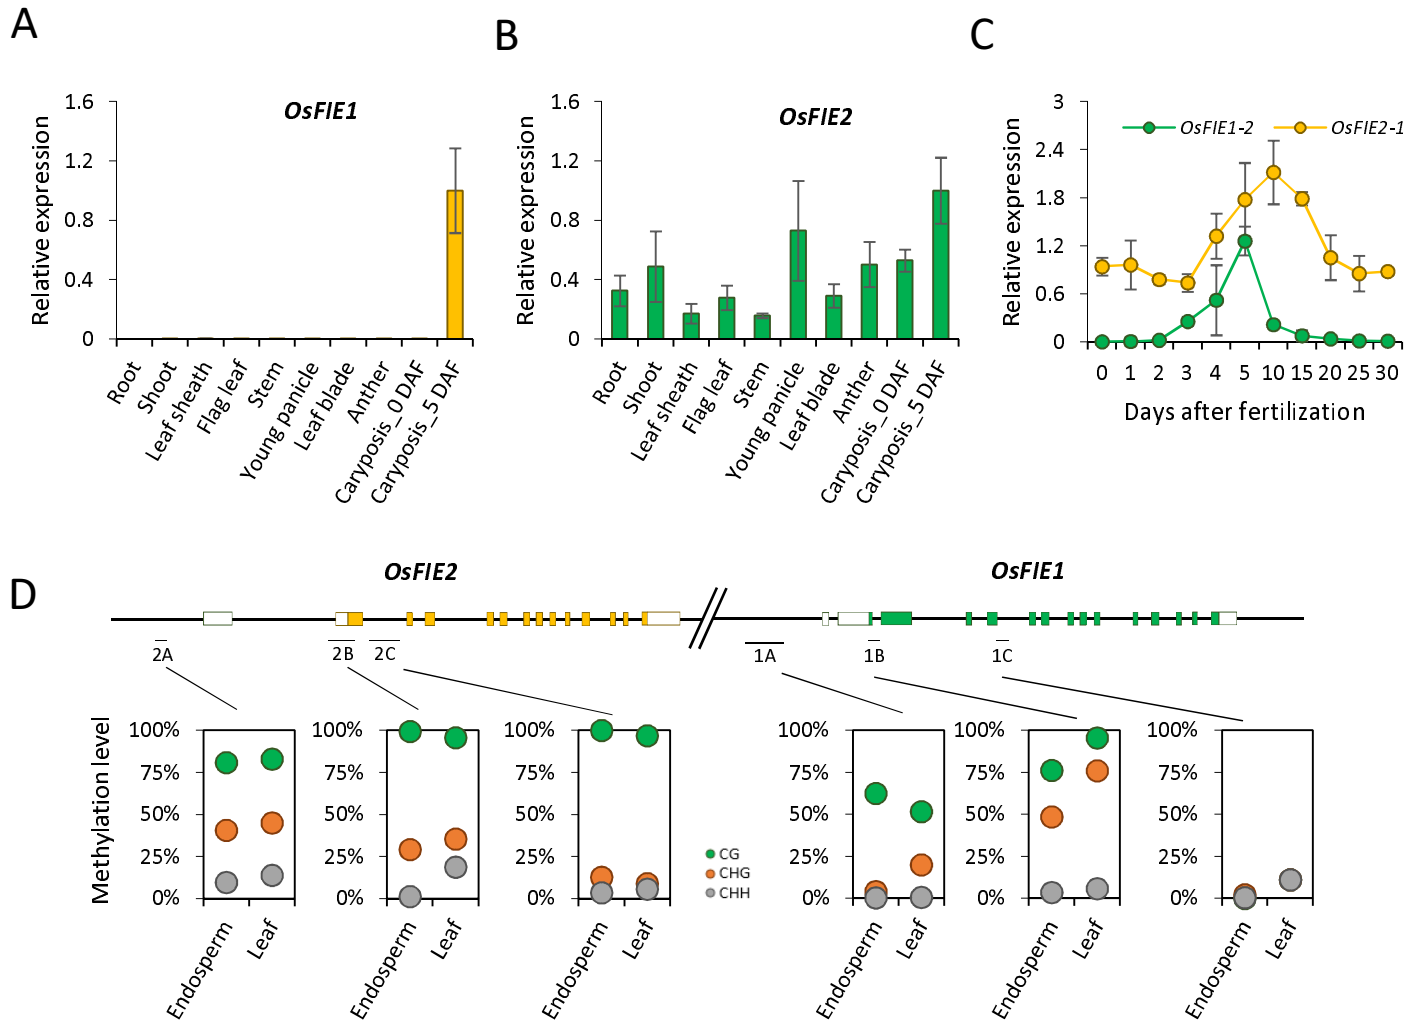

**Supplementary Figure 3. Expression profiles and DNA methylation landscapes of *OsFIE1* and *OsFIE2*.**

(A, B). Relative expression of *OsFIE1* (A) and *OsFIE2* (B) in different tissues of rice.

(C). Relative expression of *OsFIE1* and *OsFIE2* in different aged caryopsis of rice.

(D). DNA methylation level of different segments of *OsFIE1* and *OsFIE2* that indicated on the schematic figure. At least 10 clones of each BS-PCR product were sequenced to estimate the methylation.

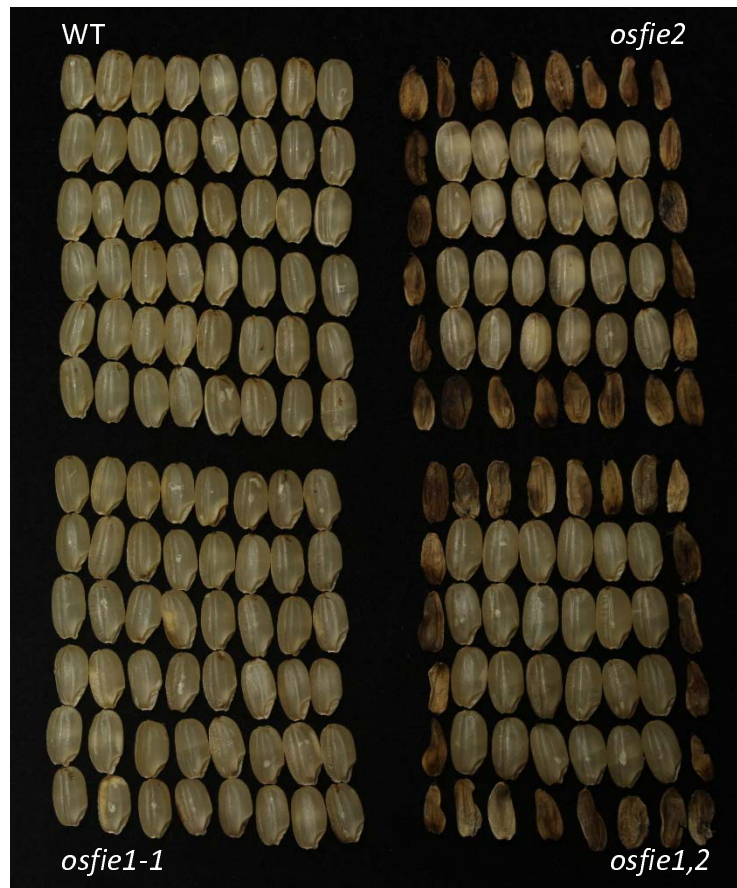

**Supplementary Figure 4. Seed phenotype of WT, *osfie1*, *OsFIE2*<sup>+</sup> and *osfie1/OsFIE2*<sup>+</sup> at mature stages.**

Class 1 seeds produced by *OsFIE2*<sup>+</sup> and *osfie1/OsFIE2*<sup>+</sup> (central) were resemble to those produced by WT and *osfie1*. Class 2 seeds (peripheral) were enlarged but empty.

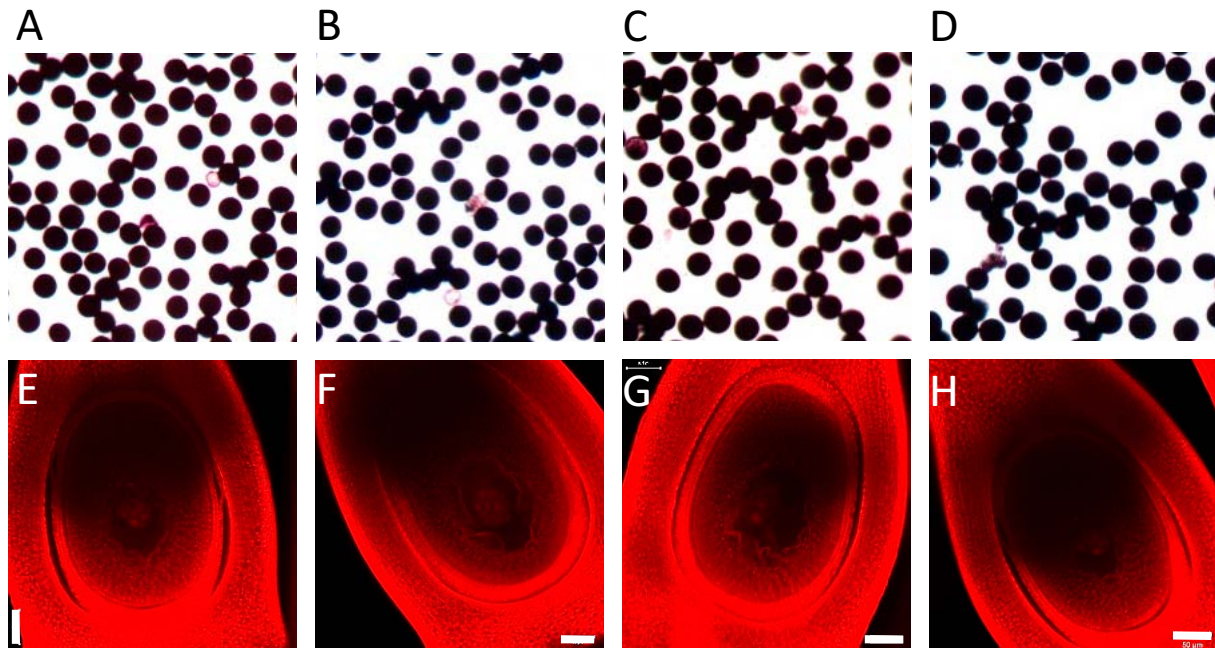

**Supplementary Figure 5. The viability of pollen grains and embryo sac of WT, *osfie1*, *osfie2* and *osfie1,2*.**

(A-D). I<sub>2</sub>-KI staining of the pollen grains of WT (A), *osfie1* (B), *OsFIE2<sup>+</sup>* (C) and *osfie1/OsFIE2<sup>+</sup>* (D). There were no viability differences showed among the pollens of different genotypes.

(E-H). CMSL observation of the embryo sacs of WT (E), *osfie1* (F), *OsFIE2<sup>+</sup>* (G) and *osfie1/OsFIE2<sup>+</sup>* (H). A representative embryo sac for each genotype was presented. The embryo sacs generally showed no difference between different genotypes. Bar=50  $\mu$ m.

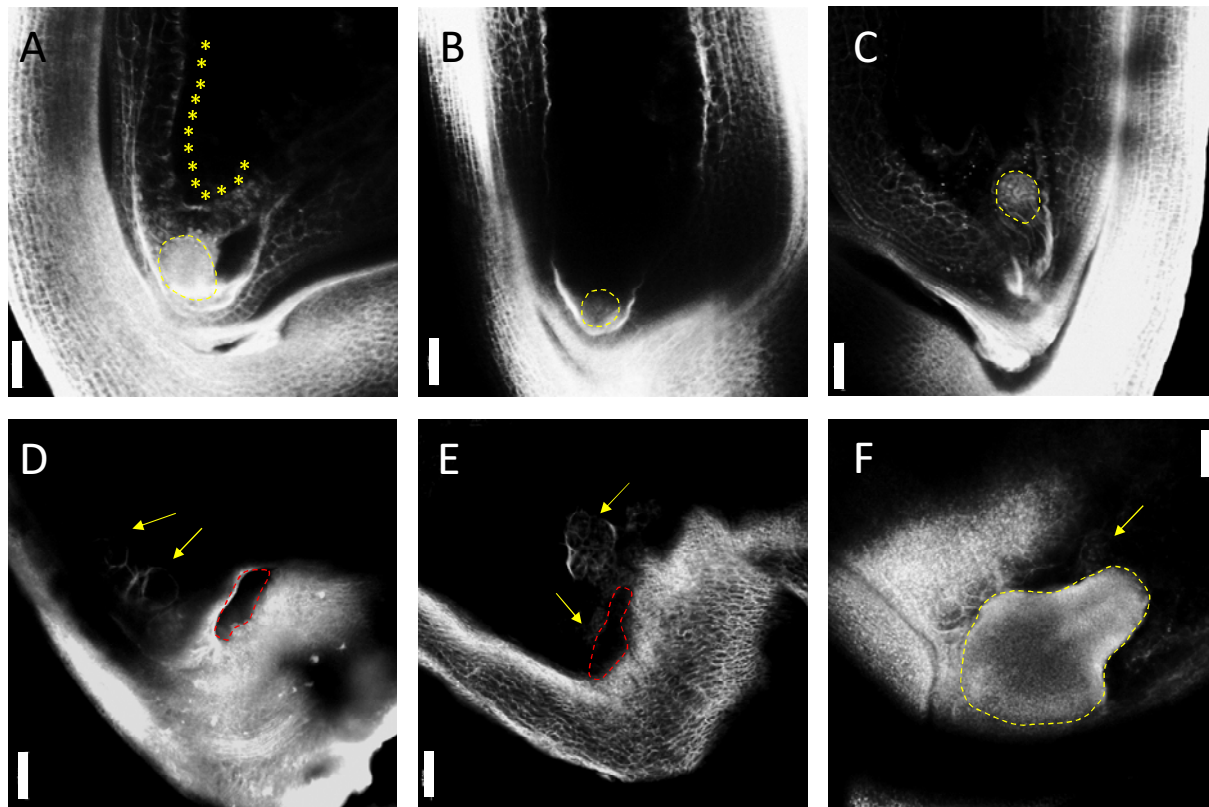

**Supplementary Figure 6. CLSM observation of the embryo development of WT, *osfie2* and *osfie1,2*.**

(A-C). Embryo development of WT (A), *osfie2* (B) and *osfie1,2* (C) at 4 DAF. Globular embryos are circled by yellow dash lines. The cellularized cells of WT are indicated by stars. Bar=50  $\mu\text{m}$ .

(D-F). Observation of the embryos of *osfie2* (D) and *osfie1,2* (E and F) at 15 DAF. The cavities left by degenerated embryos are indicated by red dash lines in (D and E); an arrested yet degenerated embryo of *osfie1,2* is highlighted by yellow dash line. The abnormal endosperm cells are indicated by arrows. Bar=100  $\mu\text{m}$ .



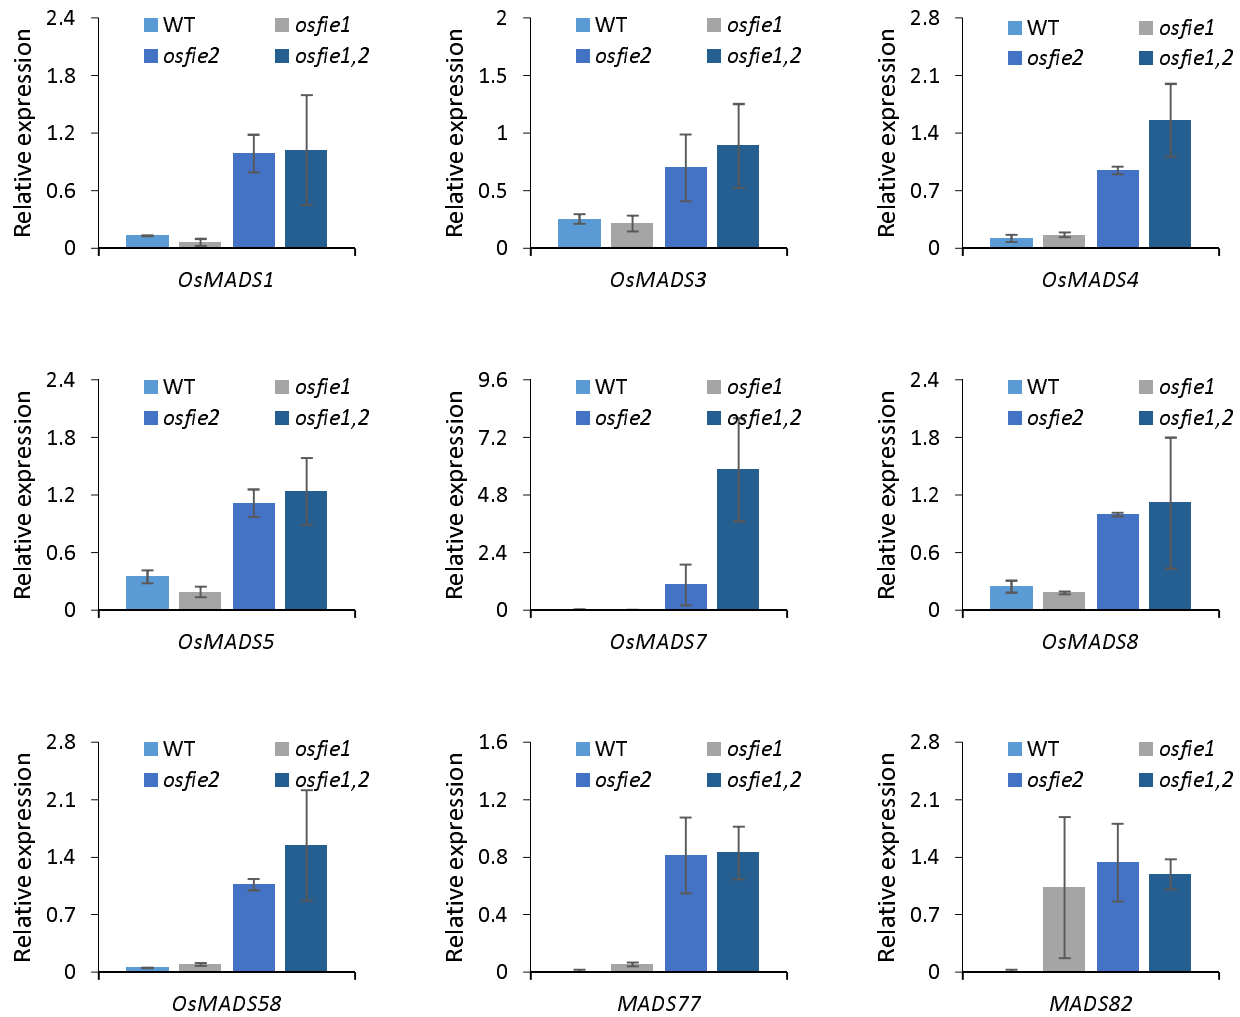

**Supplementary Figure 7. Relative expression of some MADS-box genes in the endosperm of WT, *osfie1*, *osfie2* and *osfie1,2*.**
